# Supplementary material for: Near Chromosome-Level Genome Assembly and Annotation of <i>Rhodotorula babjevae</i> Strains Reveals High Intraspecific Divergence
Source: Preprints.org preprint supplement (doi:10.20944/preprints202111.0517.v1), 2021-11-29
Supplement: Supplementary file 2 [file supplementary]

**Supplementary information**

­­ Near chromosome-level genome assembly and annotation of *Rhodotorula babjevae* strains reveals high intraspecific divergence

Giselle C. Martín-Hernández1, Bettina Müller1, Christian Brandt2,3, Martin Hölzer2,4, Adrian Viehweger2,5, Volkmar Passoth1,*

1Department of Molecular Sciences, Swedish University of Agricultural Sciences, 75007 Uppsala, Sweden

2nanozoo GmbH, Leipzig, Germany

3Institute for Infectious Diseases and Infection Control, Jena University Hospital, Jena, Germany

4RNA Bioinformatics and High-Throughput Analysis, Friedrich Schiller University Jena, Jena, Germany

5Department of Medical Microbiology, University Hospital Leipzig, Germany

*Author for Correspondence: Volkmar Passoth, Department of Molecular Sciences, Swedish University of Agricultural Sciences, Uppsala, Sweden, +4618673380, [Volkmar.Passoth@slu.se](mailto:Volkmar.Passoth@slu.se)

**Supplementary Table 1.** Program versions used for the genome assembly and annotation pipeline

**Supplementary Table 2.** Characteristics from the contigs and scaffolds of*Rhodotorula babjevae* CBS 7808 genome assembly

**Supplementary Table 3.** Characteristics from the contigs and scaffolds of*Rhodotorula babjevae* DBVPG 8058 genome assembly

**Supplementary Table 4.** Distribution of exon counts in the transcriptome of two strains of *Rhodotorula babjevae*.

**Supplementary Table 5.** Examples of lipid and carotenoid metabolism related genes in *Rhodotorula babjevae* CBS 7808 genome assembly

**Supplementary Table 6.** Examples of lipid and carotenoid metabolism related genes in *Rhodotorula babjevae* DBVPG 8058 genome assembly

**Supplementary Table 7.** Contigs with assigned homology between *Rhodotorula babjevae* strains

**Supplementary Table 8.** Summary of features from strain-unique contigs in *Rhodotorula babjevae*

**Supplementary Table 9.** Genetic divergence between *Rhodotorula babjevae* strains and closely related *Rhodotorula* species

**Supplementary Table 10.** Alignment statistics of the duplicated genes from the genome of *Rhodotorula babjevae* CBS 7808 identified by OrthoVenn2

**Supplementary Table 11.** Alignment statistics of the duplicated genes from the genome of *Rhodotorula babjevae* DBVPG 8058 identified by OrthoVenn2

**Supplementary Table 12.** Alignment statistics of the duplicated genes from the genome of *Rhodotorula babjevae* CBS 7808 identified by BLASTp

**Supplementary Table 13.** Alignment statistics of the duplicated genes from the genome of *Rhodotorula babjevae* DBVPG 8058 identified by BLASTp

**Supplementary Figure 1.** Allele frequency values of single nucleotide polymorphisms (SNP) in *Rhodotorula babjevae*.

**Supplementary Figure 2.** Gene Ontology (GO) term summary related to the GO topic: molecular functions

**Supplementary Figure 3.** Gene Ontology (GO) term summaries belonging to the GO topic: biological processes

**Supplementary Figure 4.** Gene Ontology (GO) term summaries belonging to the GO topic: cellular components

**Supplementary Figure 5.** Examples of lipid metabolism pathways in *Rhodotorula* *babjevae* CBS 7808 reconstructed by KEGG Mapper

**Supplementary Figure 6.** Examples of lipid metabolism pathways in *Rhodotorula* *babjevae* DBVPG 8058 reconstructed by KEGG Mapper

**Supplementary Figure 7.** Quantitative assessment of the hybrid genome assemblies and annotation completeness using Benchmarking Universal Single-Copy Orthologs (BUSCO)

**Supplementary Figure 8.** LASTZ alignment of the mitochondrial genome sequences from *Rhodotorula babjevae* CBS 7808 andDBVPG 8058

**Supplementary Figure 9.** LASTZ alignment of contigs with assigned homology from *Rhodotorula babjevae* CBS 7808 andDBVPG 8058 representing putative chromosomes

**Supplementary Table 1.** Program versions used for the genome assembly and annotation pipeline

| Program | Version |
| --- | --- |
| Bandage | 0.8.1 |
| BBMap | 38.86 |
| Biopython | 1.74 |
| BioRuby | 2.0.1 |
| BUSCO | 3.0.2 |
| BWA | 0.7.17 |
| chromoMap | 0.2 |
| dammit | 1.2 |
| fastp | 0.20.0 |
| FastQC | 0.11.8 |
| Filtlong | 0.2.0 |
| Flye | 2.8 |
| ggplot2 | 3.3.1 |
| HISAT | 2.2.0 |
| Medaka | 0.10.0 |
| MetaEuk | 1.ea903e5 |
| minimap2 | 2.17 |
| MITOS | 2.0.3 |
| MultiQC | 1.8 |
| NanoPlot | 1.25.0 |
| Pilon | 1.23 |
| Racon | 1.4.7 |
| RepeatMasker | 4.0.9 |
| samtools | 1.10 |
| simple-circularise | 1.0 |
| SortMeRNA | 2.1b |
| sourmash | 2.0.1 |
| StringTie | 2.1.1 |
| Tapestry | 1.0.0 |

**Supplementary Table 2.** Characteristics from the contigs and scaffolds of*Rhodotorula babjevae* CBS 7808 genome assembly

| **Contig/scaffold** | **Length (bp)** | **GC content (%)** | **Read depth** | **No. of telomeric regions** |
| --- | --- | --- | --- | --- |
| ontig_10 | 1,067,634 | 67.97 | 39 | 0 |
| contig_11 | 1,300,441 | 68.18 | 42 | 1 |
| contig_12 | 511,897 | 68.45 | 33 | 0 |
| contig_2 | 30,876 | 38.85 | 892 | 2 |
| contig_25 | 627,118 | 68.03 | 47 | 0 |
| contig_26 | 40,644 | 57.95 | 20 | 1 |
| contig_27 | 320,063 | 67.64 | 31 | 1 |
| contig_28 | 422,133 | 67.84 | 36 | 0 |
| contig_3 | 1,574,520 | 68.39 | 49 | 1 |
| contig_30 | 1,569,459 | 68.66 | 48 | 0 |
| contig_31 | 979,228 | 68.28 | 40 | 1 |
| contig_36 | 1,056,323 | 68.50 | 52 | 0 |
| contig_37 | 362,52 | 68.05 | 34 | 0 |
| contig_38 | 881,966 | 68.53 | 51 | 1 |
| contig_39 | 564,129 | 68.13 | 41 | 1 |
| contig_4 | 418,972 | 67.71 | 38 | 1 |
| contig_45 | 762,86 | 68.32 | 37 | 1 |
| contig_46 | 8,677 | 65.90 | 79 | 0 |
| contig_5 | 2,415,752 | 68.54 | 46 | 1 |
| contig_62 | 644,441 | 68.12 | 42 | 0 |
| contig_65 | 630,535 | 68.27 | 52 | 1 |
| contig_66 | 406,102 | 68.73 | 45 | 0 |
| contig_7 | 1,460,653 | 68.35 | 46 | 1 |
| contig_9 | 429,397 | 68.87 | 36 | 1 |
| scaffold_40 | 948,604 | 68.04 | 50 | 0 |
| scaffold_49 | 1,089,446 | 67.93 | 52 | 0 |
| scaffold_6 | 1,337,997 | 68.23 | 46 | 1 |

**Supplementary Table 3.** Characteristics from the contigs and scaffolds of*Rhodotorula babjevae* DBVPG 8058 genome assembly

| **Contig/scaffold** | **Length (bp)** | **GC content (%)** | **Read depth** | **No. of telomeric regions** |
| --- | --- | --- | --- | --- |
| contig_1 | 565,532 | 67.52 | 44 | 1 |
| contig_20 | 637,402 | 68.57 | 43 | 0 |
| contig_33 | 529,001 | 68.19 | 42 | 2 |
| contig_38 | 1,780,658 | 68.22 | 43 | 0 |
| contig_40 | 1,004,683 | 68.30 | 43 | 1 |
| contig_42 | 1,446,680 | 68.41 | 45 | 0 |
| contig_44 | 357,974 | 68.15 | 44 | 0 |
| contig_45 | 394,205 | 68.00 | 42 | 0 |
| contig_46 | 670,828 | 68.68 | 42 | 1 |
| contig_47 | 557,103 | 68.12 | 43 | 0 |
| contig_48 | 931,129 | 68.59 | 43 | 1 |
| contig_49 | 396,114 | 68.44 | 40 | 1 |
| contig_51 | 924,743 | 68.52 | 45 | 1 |
| contig_53 | 571,073 | 67.98 | 43 | 1 |
| contig_54 | 766,724 | 68.39 | 40 | 0 |
| contig_57 | 1,049,892 | 68.40 | 43 | 1 |
| contig_65 | 41,334 | 67.14 | 59 | 1 |
| contig_66 | 419,035 | 67.94 | 44 | 1 |
| contig_68 | 408,627 | 68.12 | 39 | 0 |
| contig_69 | 1,447,990 | 68.48 | 45 | 1 |
| contig_70 | 789,767 | 68.03 | 43 | 0 |
| contig_71 | 449,691 | 68.69 | 42 | 1 |
| contig_72 | 5,97 | 48.69 | 306 | 2 |
| contig_73 | 659,761 | 67.77 | 41 | 0 |
| contig_74 | 614,034 | 68.46 | 41 | 0 |
| contig_75 | 900,917 | 68.16 | 43 | 0 |
| contig_77 | 446,828 | 68.09 | 43 | 1 |
| contig_79 | 28,432 | 38.89 | 1160 | 1 |
| contig_82 | 299,18 | 68.75 | 40 | 2 |
| contig_83 | 6,381 | 59.36 | 101 | 0 |
| contig_84 | 425,34 | 67.39 | 45 | 0 |
| contig_85 | 573,802 | 68.36 | 41 | 1 |
| contig_86 | 443,617 | 68.68 | 42 | 1 |
| scaffold_52 | 977,625 | 68.29 | 43 | 1 |

**Supplementary Table 4.** Distribution of exon counts in the transcriptome of two strains of *Rhodotorula babjevae*.

| Strain | CBS 7808 | DBVPG 8058 |
| --- | --- | --- |
| Exons per transcript | Number of transcripts | |
| 1 | 1201 | 1176 |
| 2 | 1400 | 1417 |
| 3 | 1367 | 1366 |
| 4 | 1108 | 1154 |
| 5 | 808 | 767 |
| 6 | 581 | 539 |
| 7 | 391 | 385 |
| 8 | 275 | 268 |
| 9 | 168 | 159 |
| 10 | 121 | 95 |
| 11 | 61 | 68 |
| 12 | 42 | 54 |
| 13 | 36 | 29 |
| 14 | 19 | 17 |
| 15 | 11 | 8 |
| 16 | 5 | 5 |
| 17 | 4 | 3 |
| 18 | 2 | 2 |
| 19 | 2 | 1 |
| 20 | 3 | 1 |
| 21 | 0 | 1 |
| 23 | 0 | 1 |
| 24 | 2 | 0 |
| Total | 7607 | 7516 |

**Supplementary Table 5.** Examples of lipid and carotenoid metabolism related genes in *Rhodotorula babjevae* CBS 7808 genome assembly

| **Gene** | **Enzyme** | **EC** | **Pathway** | **Contig/scaffold** | **Gene ID** |
| --- | --- | --- | --- | --- | --- |
| *CDC19* | Pyruvate kinase 1 | 2.7.1.40 | Glycolysis | contig_10 | NANOZOOG247, NANOZOOG248 |
| *MAE1* | NADP-dependent malic enzyme | 1.1.1.40 | NADPH regeneration | contig_10 | NANOZOOG21 |
| *MAE2* | NAD-dependent malic enzyme 3 | 1.1.1.38 | Tricarboxylic acid cycle | contig_36 | NANOZOOG2566 |
| *ACL2* | ATP-citrate synthase subunit 2 | 2.3.3.8 | Lipid synthesis | contig_30 | NANOZOOG1597 |
| *ACL1* | ATP-citrate synthase subunit 1 | 2.3.3.8 | Lipid synthesis | contig_30 | NANOZOOG1598 |
| *ACC1* | Acetyl-CoA carboxylase | 6.4.1.2 | Fatty acid synthesis | scaffold_6 | NANOZOOG7298, NANOZOOG7299, NANOZOOG7300 |
| *FAS1* | β- subunit of fatty acid synthase complex | 2.3.1.86 | Fatty acid synthesis | scaffold_6 | NANOZOOG7332, NANOZOOG7509 |
| *FAS2* | 𝛼- subunit of fatty acid synthase complex | 2.3.1.86 | Fatty acid synthesis | scaffold_6 | NANOZOOG7507, NANOZOOG7508 |
| *OLE1* | Acyl-CoA desaturase | 1.14.19.1 | Unsaturated fatty acid synthesis | contig_30 | NANOZOOG1596 |
| *ACAD11* | Acyl-CoA dehydrogenase family member 11 | 1.3.99 | Fatty acid beta-oxidation | scaffold_6 | NANOZOOG7232 |
| *IBR3* | Probable acyl-CoA dehydrogenase IBR3 | 1.3.99 | Fatty acid beta-oxidation | scaffold_49 | NANOZOOG6894 |
| *ECI1* | Enoyl-CoA hydratase 1 | 4.2.1.17 | Fatty acid beta-oxidation | scaffold_49 | NANOZOOG6861 |
| *ECI1* | Enoyl-CoA hydratase 1 | 4.2.1.17 | Fatty acid beta-oxidation | contig_11 | NANOZOOG791 |
| *POT1* | Acetyl-CoA acyltransferase | 2.3.1.16 | Fatty acid beta-oxidation | contig_3 | NANOZOOG3582, NANOZOOG3634 |
| *POT1* | Acetyl-CoA acyltransferase | 2.3.1.16 | Fatty acid beta-oxidation | contig_65 | NANOZOOG5517 |
| *POT1* | Acetyl-CoA acyltransferase | 2.3.1.16 | Fatty acid beta-oxidation | contig_36 | NANOZOOG2634 |
| *LRO1* | Phospholipid:diacylglycerol acyltransferase | 2.3.1.158 | Glicerolipid synthesis | contig_5 | NANOZOOG4705 |
| *HMG1* | HMG-CoA reductase | 1.1.1.34 | Isoprenoid synthesis | contig_31 | NANOZOOG2214, NANOZOOG2215, NANOZOOG2216 |
| *HCS1* | HMG-CoA synthase | 2.3.3.10 | Isoprenoid synthesis | contig_62 | NANOZOOG5192 |
| *ERG8* | Phosphomevalonate kinase, peroxisomal | 2.7.4.2 | Isoprenoid synthesis | scaffold_6 | NANOZOOG7354 |
| *crtYB* | Bifunctional lycopene cyclase/phytoene synthase | 5.5.1.19 & 2.5.1.32 | Carotenoid synthesis | scaffold_6 | NANOZOOG7200 |
| *crtI* | Phytoene desaturase | 1.3.99.30 | Carotenoid synthesis | scaffold_6 | NANOZOOG7203 |
| *BTS1* | Geranylgeranyl pyrophosphate synthase | 2.5.1.- | Carotenoid synthesis | contig_5 | NANOZOOG4762 |

**Supplementary Table 6.** Examples of lipid and carotenoid metabolism related genes in *Rhodotorula babjevae* DBVPG 8058 genome assembly

| **Gene** | **Enzyme** | **EC** | **Pathway** | **Contig/scaffold** | **Gene ID** |
| --- | --- | --- | --- | --- | --- |
| *CDC19* | Pyruvate kinase 1 | 2.7.1.40 | Glycolysis | contig_54 | NANOZOOG3961, NANOZOOG3962 |
| *MAE1* | NADP-dependent malic enzyme | 1.1.1.40 | NADPH regeneration | contig_47 | NANOZOOG2569 |
| *MAE2* | NAD-dependent malic enzyme 2 | 1.1.1.38 | Tricarboxylic acid cycle | contig_57 | NANOZOOG4100 |
| *ACL1* | ATP-citrate synthase subunit 1 | 2.3.3.8 | Lipid synthesis | contig_20 | NANOZOOG209 |
| *ACC1* | Acetyl-CoA carboxylase | 6.4.1.2 | Fatty acid synthesis | contig_70 | NANOZOOG5315, NANOZOOG5316, NANOZOOG5317, NANOZOOG5318 |
| *FAS1* | β- subunit of fatty acid synthase complex | 2.3.1.86 | Fatty acid synthesis | contig_70 | NANOZOOG5349 |
| *FAS2* | 𝛼- subunit of fatty acid synthase complex | 2.3.1.86 | Fatty acid synthesis | contig_33 | NANOZOOG458, NANOZOOG459 |
| *OLE1* | Acyl-CoA desaturase | 1.14.19.1 | Unsaturated fatty acid synthesis | contig_20 | NANOZOOG210 |
| *ACAD10* | Acyl-CoA dehydrogenase family member 10 | 1.3.99 | Fatty acid beta-oxidation | contig_53 | NANOZOOG3588 |
| *ACAD11* | Acyl-CoA dehydrogenase family member 11 | 1.3.99 | Fatty acid beta-oxidation | contig_70 | NANOZOOG5252 |
| *IBR3* | Probable acyl-CoA dehydrogenase IBR3 | 1.3.99 | Fatty acid beta-oxidation | contig_40 | NANOZOOG1380 |
| *D6C81_05617* | Enoyl-CoA hydratase 1 | 4.2.1.17 | Fatty acid beta-oxidation | contig_40 | NANOZOOG1413 |
| *POT1* | Acetyl-CoA acyltransferase | 2.3.1.16 | Fatty acid beta-oxidation | contig_57 | NANOZOOG4029 |
| *POT1* | Acetyl-CoA acyltransferase | 2.3.1.16 | Fatty acid beta-oxidation | contig_74 | NANOZOOG5938 |
| *POT1* | Acetyl-CoA acyltransferase | 2.3.1.16 | Fatty acid beta-oxidation | contig_75 | NANOZOOG6026, NANOZOOG6080 |
| *HMG1* | HMG-CoA reductase | 1.1.1.34 | Isoprenoid synthesis | contig_82 | NANOZOOG6558, NANOZOOG6559, NANOZOOG6560 |
| *HCS1* | HMG-CoA synthase | 2.3.3.10 | Isoprenoid synthesis | contig_38 | NANOZOOG1015 |
| *crtYB* | Bifunctional lycopene cyclase/phytoene synthase | 5.5.1.19 & 2.5.1.32 | Carotenoid synthesis | contig_70 | NANOZOOG5230 |
| *crtI* | Phytoene desaturase | 1.3.99.30 | Carotenoid synthesis | contig_70 | NANOZOOG5227 |
| *BTS1* | Geranylgeranyl pyrophosphate synthase | 2.5.1.- | Carotenoid synthesis | contig_69 | NANOZOOG5016 |

**Supplementary Table 7.** Contigs with assigned homology between *Rhodotorula babjevae* strains

| **DBVPG8058_contigs** | | | | | | | | | | | | | | | | | | | | | | | | | | | | | | | | | | |
| --- | --- | --- | --- | --- | --- | --- | --- | --- | --- | --- | --- | --- | --- | --- | --- | --- | --- | --- | --- | --- | --- | --- | --- | --- | --- | --- | --- | --- | --- | --- | --- | --- | --- | --- |
| **CBS7808_** | 1 | 20 | 33 | 38 | 40 | 42 | 44 | 45 | 46 | 47 | 48 | 49 | 51 | 53 | 54 | 57 | 65 | 66 | 68 | 69 | 70 | 71 | 72 | 73 | 74 | 75 | 77 | 79 | 82 | 83 | 84 | 85 | 86 | 52 |
| **contigs** |
| 2 |  |  |  |  |  |  |  |  |  |  |  |  |  |  |  |  |  |  |  |  |  |  |  |  |  |  |  | 97 |  |  |  |  |  |  |
| 3 |  |  |  |  |  |  |  |  | 85 |  |  |  |  |  |  |  |  |  |  |  |  |  |  |  |  | 84 |  |  |  |  |  |  |  |  |
| 4 |  |  |  |  |  |  |  | 82 |  |  |  |  |  |  |  |  |  |  |  |  |  |  |  |  |  |  |  |  |  |  |  |  |  |  |
| 5 |  |  |  |  |  |  |  |  |  |  |  |  |  |  |  |  |  |  |  | 84 |  |  |  |  |  |  |  |  |  |  |  |  |  | 84 |
| 7 |  |  |  |  |  |  |  |  |  |  | 84 |  |  | 86 |  |  |  |  |  |  |  |  |  |  |  |  |  |  |  |  |  |  |  |  |
| 9 |  |  |  |  |  |  |  |  |  |  |  |  |  |  |  |  |  |  |  |  |  |  |  |  |  |  |  |  |  |  |  |  | 87 |  |
| 10 |  |  |  |  |  |  |  |  |  | 82 |  |  |  |  | 85 |  |  |  |  |  |  |  |  |  |  |  |  |  |  |  |  |  |  |  |
| 11 |  |  |  |  |  | 84 | 86 |  |  |  |  |  |  |  |  |  |  |  |  |  |  |  |  |  |  |  |  |  |  |  | 85 |  |  |  |
| 12 |  |  |  |  |  |  |  |  |  |  |  |  |  |  |  |  |  |  | 84 |  |  | 86 |  |  |  |  |  |  |  |  |  |  |  |  |
| 25 |  |  |  |  |  |  |  |  |  |  |  |  |  |  |  |  |  |  |  |  |  |  |  |  |  |  |  |  |  |  |  | 85 |  |  |
| 26 |  |  |  |  |  |  |  |  |  |  |  |  |  |  |  |  |  |  |  |  |  |  |  |  |  |  |  |  |  |  |  |  |  |  |
| 27 |  |  |  | 85 |  |  |  |  |  |  |  |  |  |  |  |  |  |  |  |  |  |  |  |  |  |  |  |  |  |  |  |  |  |  |
| 28 |  |  |  |  |  |  |  |  |  |  |  |  |  |  |  |  |  | 84 |  |  |  |  |  |  |  |  |  |  |  |  |  |  |  |  |
| 30 |  | 84 |  |  |  | 84 | 86 |  |  |  |  |  |  |  |  |  |  |  |  |  |  |  |  |  |  |  |  |  |  |  |  |  |  |  |
| 31 |  |  |  |  |  |  |  |  |  |  |  |  |  |  |  |  |  |  |  |  |  |  |  | 84 |  |  |  |  | 85 |  |  |  |  |  |
| 36 |  |  |  |  |  |  |  |  |  |  |  |  |  |  |  | 83 |  |  |  |  |  |  |  |  |  |  |  |  |  |  |  |  |  |  |
| 37 |  |  |  |  |  |  |  |  |  |  |  |  |  |  |  |  |  |  | 84 |  |  | 86 |  |  |  |  |  |  |  |  |  |  |  |  |
| 38 |  |  |  | 85 |  |  |  |  |  |  |  |  |  |  |  |  |  |  |  |  |  |  |  |  |  |  |  |  |  |  |  |  |  |  |
| 39 | 85 |  |  |  |  |  |  |  |  |  |  |  |  |  |  |  |  |  |  |  |  |  |  |  |  |  |  |  |  |  |  |  |  |  |
| 45 |  |  |  |  |  |  |  |  |  |  |  |  |  |  | 85 |  |  |  |  |  |  |  |  |  |  |  | 86 |  |  |  |  |  |  |  |
| 46 |  |  |  |  |  |  |  |  |  |  |  |  |  |  |  |  |  |  |  |  |  |  |  |  |  |  |  |  |  |  |  |  |  |  |
| 62 |  |  |  | 85 |  |  |  |  |  |  |  |  |  |  |  |  |  |  |  |  |  |  |  |  |  |  |  |  |  |  |  |  |  |  |
| 65 |  |  |  |  |  |  |  |  |  |  |  |  |  |  |  |  |  |  |  |  |  |  |  |  | 83 |  |  |  |  |  |  |  |  |  |
| 66 |  |  |  |  |  |  |  |  |  |  |  | 85 |  |  |  |  |  |  |  |  |  |  |  |  |  |  |  |  |  |  |  |  |  |  |
| 6 |  |  | 82 |  |  |  |  |  |  |  |  |  |  |  |  |  |  |  |  |  | 83 |  |  |  |  |  |  |  |  |  |  |  |  |  |
| 40 |  |  |  |  |  |  |  |  |  |  |  |  | 84 |  |  |  |  |  |  |  |  |  |  |  |  |  |  |  |  |  |  |  |  |  |
| 49 |  |  |  |  | 83 |  |  |  |  |  |  |  |  |  |  |  | 91 |  |  |  |  |  |  |  |  |  |  |  |  |  |  |  |  |  |

The contigs corresponding to the mitochondrial genome are denoted in yellow and to putative extrachromosomal elements in green.Unique forward alignments are represented in blue and unique reverse alignments in orange.

**Supplementary Table 8.** Summary of features from strain-unique contigs in *Rhodotorula babjevae*

| Contig name | *R. babjevae* strain number | Size (bp) | GC content (%) | Relative read depth* | Size of circular contig (bp) |
| --- | --- | --- | --- | --- | --- |
| contig_26 | CBS 7808 | 40,644 | 57.95 | 0,5 | 30,109 |
| contig_46 | CBS 7808 | 8,677 | 65.9 | 1,8 | - |
| contig_83 | DBVPG 8058 | 6,381 | 59.36 | 2,4 | - |
| contig_72 | DBVPG 8058 | 5,97 | 48.69 | 7,2 | - |

*Read depth of the contig divided by the average read depth of contigs with assigned homology between *Rhodotorula babjevae* strains

**Supplementary Table 9.** Genetic divergence between *Rhodotorula babjevae* strains and closely related *Rhodotorula* species

|  | *Rhodotorula babjevae* CBS 7808 | | | | |  |
| --- | --- | --- | --- | --- | --- | --- |
|  | DNA-DNA homology | | | ANI | *kr* | Accesion number |
| Strain | Distance | DDH estimate | Difference in % G+C |  |  |  |
| *R. babjevae* DBVPG 8058 | 0.5787 | 44.20% | 0.00 | 84.48% | 0.088959 | this study |
| *R. graminis* WP1 | 0.6415 | 39.00% | 0.47 | 82.85% | 0.098387 | JTAO00000000.1 |
| *R. glutinis* ZHK | 0.6240 | 40.40% | 0.43 | 83.43% | 0.095288 | JAAGPT000000000.1 |
| *R. toruloides* CBS 14 | 0.9350 | 22.40% | 6.40 | 77.01% | 0.221540 | PRJEB40807 |
|  | *Rhodotorula babjevae* DBVPG 8058 | | | | |  |
| *R. babjevae* CBS 7808 | 0.5787 | 44.20% | 0.00 | 84.48 % | 0.088959 | this study |
| *R. graminis* WP1 | 0.6349 | 39.50% | 0.48 | 82.88% | 0.096059 | JTAO00000000.1 |
| *R. glutinis* ZHK | 0.6233 | 40.40% | 0.43 | 83.26% | 0.095886 | JAAGPT000000000.1 |
| *R. toruloides* CBS 14 | 0.9319 | 22.50% | 6.40 | 77.36% | 0.205772 | PRJEB40807 |
|  | *Rhodotorula toruloides* CBS 14 | | | | |  |
| *R. toruloides* NP11 | 0.0893 | 97.60% | 0.21 | 100% | 0.000445 | ALAU00000000.1 |
| *R. toruloides* CGMCC 2.1609 | 0.3725 | 66.80% | 0.10 | 99.27% | 0.000337 | LKER00000000.1 |
| *R. toruloides* VN1 | 0.6319 | 39.7% | 0.07 | 85.48% | 0.094063 | SJTE00000000.1 |
| *R. toruloides* NBRC 0880 | 0.6456 | 38.60% | 0.00 | 85.15% | 0.101898 | [LCTV00000000.2](https://www.ncbi.nlm.nih.gov/nuccore/LCTV00000000.2) |

ANI, Average Nucleotide Identity values using the web-based calculator available at Kostas Lab [17]; DDH, DNA–DNA homology estimated using the Genome-to-Genome Distance Calculator 2.1 with GBDP2_MUMMER program [18].

**Supplementary Table 10.** Alignment statistics of the duplicated genes from the genome of *Rhodotorula babjevae* CBS 7808 identified by OrthoVenn2

| **Contig/**  **scaffold** | **Query** | **Subject** | **Inflation** | **Query**  **start** | **Query**  **stop** | **Subject**  **start** | **Subject**  **stop** | **%**  **identity** | **%**  **coverage** | **Mismatches** | **Gaps** | **Gap Bases** | **Score** | **E-Value** | **Gene ID** | **Strand** |
| --- | --- | --- | --- | --- | --- | --- | --- | --- | --- | --- | --- | --- | --- | --- | --- | --- |
| contig_10 | 7 | 2 | 1,1 | 1 | 218 | 5 | 222 | 100 | 46 | 0 | 0 | 0 | 1135 | 7E-154 | NANOZOOG8 | - |
|  |  |  |  | 290 | 456 | 222 | 385 | 95 | 34 | 6 | 1 | 3 | 783 | 1E-100 |  |  |
| contig_10 | 2 | 7 | 1,1 | 5 | 222 | 1 | 218 | 100 | 55 | 0 | 0 | 0 | 1135 | 6E-154 | NANOZOOG3 | + |
|  |  |  |  | 222 | 385 | 290 | 456 | 95 | 41 | 6 | 1 | 3 | 783 | 9E-101 |  |  |
| contig_10 | 84 | 701 | 0,9 | 12 | 359 | 1 | 401 | 68 | 94 | 66 | 7 | 63 | 1338 | 0E+00 | NANOZOOG85 | - |
| contig_11 | 701 | 84 | 0,9 | 1 | 401 | 12 | 359 | 68 | 84 | 66 | 7 | 63 | 1338 | 0E+00 | NANOZOOG701 | - |
| contig_12 | 801 | 812 | 0,8 | 1 | 280 | 1 | 304 | 89 | 82 | 8 | 1 | 24 | 1379 | 0E+00 | NANOZOOG801 | + |
| contig_12 | 812 | 801 | 0,8 | 1 | 304 | 1 | 280 | 89 | 91 | 8 | 1 | 24 | 1379 | 0E+00 | NANOZOOG812 | - |
| contig_12 | 830 | 831 | 0,5 | 13 | 178 | 1 | 166 | 100 | 93 | 0 | 0 | 0 | 894 | 1E-125 | NANOZOOG830 | + |
| contig_12 | 831 | 830 | 0,5 | 1 | 166 | 13 | 178 | 100 | 97 | 0 | 0 | 0 | 894 | 1E-125 | NANOZOOG831 | - |
| contig_12 | 865 | 866 | 0,7 | 278 | 663 | 194 | 574 | 47 | 45 | 82 | 9 | 167 | 885 | 4E-111 | NANOZOOG865 | + |
| contig_12 | 866 | 865 | 0,7 | 194 | 574 | 278 | 663 | 47 | 52 | 82 | 9 | 167 | 891 | 5E-112 | NANOZOOG866 | + |
|  |  |  |  | 1 | 92 | 118 | 236 | 56 | 16 | 25 | 3 | 27 | 363 | 6E-37 |  |  |
| contig_27 | 1195 | 1201 | 1,8 | 1144 | 1928 | 18 | 755 | 91 | 38 | 24 | 4 | 47 | 3062 | 0E+00 | NANOZOOG1195 | - |
| contig_27 | 1201 | 1195 | 1,8 | 18 | 755 | 1144 | 1928 | 91 | 90 | 24 | 4 | 47 | 3065 | 0E+00 | NANOZOOG1201 | + |
| contig_10 | 122 | 123 | 0,4 | 8 | 190 | 1 | 211 | 84 | 91 | 5 | 1 | 28 | 873 | 2E-121 | NANOZOOG123 | + |
| contig_10 | 123 | 122 | 0,4 | 1 | 211 | 8 | 190 | 87 | 87 | 0 | 1 | 28 | 905 | 3E-126 | NANOZOOG124 | - |
| contig_28 | 1319 | 1324 | 0,7 | 7 | 308 | 256 | 553 | 76 | 96 | 68 | 3 | 4 | 1123 | 2E-152 | NANOZOOG1319 | - |
| contig_28 | 1324 | 1319 | 0,7 | 1 | 245 | 62 | 309 | 83 | 44 | 38 | 2 | 3 | 960 | 1E-127 | NANOZOOG1324 | + |
| contig_30 | 1409 | 1960 | 1,8 | 1 | 789 | 26 | 830 | 90 | 58 | 68 | 2 | 16 | 3512 | 0E+00 | NANOZOOG1409 | - |
| contig_30 | 1960 | 1409 | 1,8 | 26 | 830 | 1 | 789 | 90 | 95 | 63 | 2 | 16 | 3419 | 0E+00 | NANOZOOG1956 | + |
| contig_30 | 1409 | 2182 | 1,8 | 1 | 1354 | 3 | 1301 | 87 | 96 | 112 | 5 | 59 | 5497 | 0E+00 | NANOZOOG1409 | - |
| contig_31 | 2182 | 1409 | 1,8 | 3 | 1301 | 1 | 1354 | 87 | 99 | 111 | 5 | 59 | 5492 | 0E+00 | NANOZOOG2177 | + |
| contig_30 | 1409 | 5744 | 1,8 | 1 | 1354 | 3 | 1301 | 87 | 96 | 112 | 5 | 59 | 5497 | 0E+00 | NANOZOOG1409 | - |
| contig_66 | 5744 | 1409 | 1,8 | 3 | 1340 | 1 | 1354 | 90 | 100 | 112 | 4 | 20 | 5706 | 0E+00 | NANOZOOG5732 | + |
| contig_30 | 1428 | 1430 | 1,0 | 1 | 294 | 1 | 290 | 99 | 58 | 0 | 1 | 4 | 1501 | 0E+00 | NANOZOOG1428 | - |
| contig_30 | 1430 | 1428 | 1,0 | 154 | 290 | 1 | 137 | 100 | 47 | 0 | 0 | 0 | 701 | 5E-92 | NANOZOOG1429 | + |
| contig_30 | 1500 | 1501 | 0,7 | 15 | 276 | 30 | 296 | 76 | 94 | 55 | 4 | 9 | 1038 | 9E-144 | NANOZOOG1499 | - |
| contig_30 | 1501 | 1500 | 0,7 | 1 | 301 | 1 | 301 | 100 | 100 | 0 | 0 | 0 | 1566 | 0E+00 | NANOZOOG1500 | - |
| contig_30 | 1515 | 1516 | 0,6 | 1 | 189 | 31 | 219 | 100 | 99 | 0 | 0 | 0 | 983 | 3E-138 | NANOZOOG1514 | + |
| contig_30 | 1516 | 1515 | 0,6 | 31 | 219 | 1 | 189 | 100 | 86 | 0 | 0 | 0 | 983 | 3E-138 | NANOZOOG1515 | - |
| contig_30 | 1587 | 1588 | 0,2 | 1 | 204 | 1 | 242 | 84 | 100 | 0 | 1 | 38 | 782 | 4E-103 | NANOZOOG1586 | - |
| contig_30 | 1588 | 1587 | 0,2 | 1 | 242 | 1 | 204 | 84 | 38 | 0 | 1 | 38 | 782 | 1E-102 | NANOZOOG1587 | + |
| contig_30 | 1749 | 1763 | 1,0 | 1 | 509 | 1 | 551 | 64 | 89 | 80 | 13 | 134 | 1713 | 0E+00 | NANOZOOG1746 | + |
| contig_30 | 1763 | 1749 | 1,0 | 1 | 551 | 1 | 509 | 64 | 84 | 80 | 13 | 134 | 1713 | 0E+00 | NANOZOOG1760 | - |
| contig_30 | 1886 | 5661 | 0,5 | 140 | 358 | 120 | 337 | 73 | 59 | 47 | 4 | 15 | 702 | 4E-91 | NANOZOOG1883 | - |
|  |  |  |  | 1 | 27 | 74 | 100 | 96 | 8 | 1 | 0 | 0 | 133 | 3E-09 |  |  |
| contig_66 | 5661 | 1886 | 0,5 | 122 | 337 | 142 | 358 | 75 | 64 | 51 | 3 | 3 | 767 | 6E-101 | NANOZOOG5649 | - |
|  |  |  |  | 74 | 100 | 1 | 27 | 96 | 8 | 1 | 0 | 0 | 134 | 3E-09 |  |  |
| contig_30 | 1917 | 1931 | 0,7 | 67 | 400 | 170 | 511 | 64 | 82 | 105 | 4 | 22 | 1137 | 1E-153 | NANOZOOG1914 | + |
| contig_30 | 1931 | 1917 | 0,7 | 142 | 511 | 47 | 400 | 60 | 68 | 119 | 6 | 30 | 1137 | 1E-153 | NANOZOOG1927 | + |
| contig_30 | 1960 | 2182 | 1,8 | 24 | 830 | 1 | 736 | 80 | 89 | 93 | 6 | 71 | 2959 | 0E+00 | NANOZOOG1956 | + |
| contig_31 | 2182 | 1960 | 1,8 | 1 | 736 | 24 | 830 | 80 | 56 | 89 | 6 | 71 | 3017 | 0E+00 | NANOZOOG2177 | + |
| contig_30 | 1960 | 5744 | 1,8 | 24 | 830 | 1 | 776 | 83 | 93 | 103 | 4 | 31 | 3158 | 0E+00 | NANOZOOG1956 | + |
| contig_66 | 5744 | 1960 | 1,8 | 24 | 830 | 1 | 776 | 83 | 93 | 103 | 4 | 31 | 3158 | 0E+00 | NANOZOOG5732 | + |
| contig_31 | 2140 | 2163 | 1,8 | 1 | 856 | 1 | 837 | 91 | 97 | 52 | 2 | 25 | 4077 | 0E+00 | NANOZOOG2135 | + |
| contig_31 | 2163 | 2140 | 1,8 | 1 | 837 | 1 | 856 | 91 | 100 | 52 | 2 | 25 | 4077 | 0E+00 | NANOZOOG2158 | + |
| contig_31 | 2182 | 5744 | 1,8 | 1 | 1301 | 1 | 1340 | 85 | 98 | 130 | 7 | 75 | 5228 | 0E+00 | NANOZOOG2177 | + |
| contig_66 | 5744 | 2182 | 1,8 | 1 | 1340 | 1 | 1301 | 85 | 96 | 129 | 7 | 75 | 5233 | 0E+00 | NANOZOOG5732 | + |
| contig_38 | 2814 | 2815 | 1,1 | 2 | 354 | 1 | 366 | 96 | 99 | 0 | 1 | 13 | 1752 | 0E+00 | NANOZOOG2808 | - |
| contig_38 | 2815 | 2814 | 1,1 | 1 | 366 | 2 | 354 | 96 | 96 | 0 | 1 | 13 | 1752 | 0E+00 | NANOZOOG2809 | + |
| contig_38 | 3048 | 3049 | 1,1 | 460 | 804 | 1 | 345 | 100 | 41 | 0 | 0 | 0 | 1848 | 0E+00 | NANOZOOG3042 | - |
| contig_38 | 3049 | 3048 | 1,1 | 1 | 345 | 460 | 804 | 100 | 100 | 0 | 0 | 0 | 1848 | 0E+00 | NANOZOOG3043 | + |
| contig_38 | 3071 | 3073 | 0,4 | 4 | 156 | 15 | 161 | 95 | 11 | 2 | 1 | 6 | 624 | 3E-74 | NANOZOOG3065 | - |
| contig_38 | 3073 | 3071 | 0,4 | 12 | 161 | 1 | 156 | 95 | 68 | 2 | 1 | 6 | 698 | 3E-85 | NANOZOOG3067 | + |
| contig_39 | 3191 | 3192 | 1,3 | 98 | 659 | 1 | 534 | 93 | 76 | 12 | 3 | 28 | 2647 | 0E+00 | NANOZOOG3184 | - |
| contig_39 | 3192 | 3191 | 1,3 | 1 | 534 | 98 | 659 | 93 | 100 | 12 | 3 | 28 | 2647 | 0E+00 | NANOZOOG3185 | + |
| contig_39 | 3207 | 3228 | 0,2 | 1 | 258 | 82 | 334 | 38 | 96 | 146 | 8 | 17 | 415 | 2E-49 | NANOZOOG3200 | + |
| contig_39 | 3228 | 3207 | 0,2 | 82 | 334 | 1 | 258 | 38 | 74 | 149 | 7 | 15 | 371 | 8E-43 | NANOZOOG3221 | + |
| contig_39 | 3262 | 3263 | 1,1 | 24 | 450 | 1 | 421 | 79 | 92 | 73 | 3 | 16 | 1672 | 0E+00 | NANOZOOG3255 | - |
| contig_39 | 3263 | 3262 | 1,1 | 1 | 421 | 24 | 450 | 79 | 99 | 73 | 3 | 16 | 1662 | 0E+00 | NANOZOOG3256 | - |
| contig_10 | 38 | 24 | 1,4 | 1 | 578 | 1 | 602 | 74 | 75 | 131 | 3 | 24 | 2256 | 0E+00 | NANOZOOG39 | + |
| contig_10 | 24 | 38 | 1,4 | 1 | 602 | 1 | 578 | 74 | 92 | 131 | 3 | 24 | 2222 | 0E+00 | NANOZOOG25 | - |
| contig_45 | 3996 | 4172 | 1,2 | 1 | 394 | 106 | 499 | 93 | 100 | 27 | 0 | 0 | 1889 | 0E+00 | NANOZOOG3989 | - |
| contig_46 | 4172 | 3996 | 1,2 | 106 | 499 | 1 | 394 | 93 | 41 | 27 | 0 | 0 | 1889 | 0E+00 | NANOZOOG4164 | + |
| contig_45 | 3997 | 4172 | 0,1 | 88 | 116 | 1 | 29 | 97 | 25 | 1 | 0 | 0 | 147 | 1E-12 | NANOZOOG3990 | - |
| contig_46 | 4172 | 3997 | 0,1 | 1 | 29 | 88 | 116 | 97 | 3 | 1 | 0 | 0 | 147 | 9E-12 | NANOZOOG4164 | + |
| contig_45 | 3999 | 4000 | 0,3 | 310 | 403 | 1 | 94 | 100 | 8 | 0 | 0 | 0 | 496 | 4E-59 | NANOZOOG3992 | + |
| contig_45 | 4000 | 3999 | 0,3 | 1 | 94 | 310 | 403 | 100 | 100 | 0 | 0 | 0 | 496 | 4E-60 | NANOZOOG3993 | - |
| contig_45 | 3999 | 645 | 0,4 | 590 | 1109 | 743 | 1251 | 36 | 45 | 318 | 10 | 15 | 784 | 3E-87 | NANOZOOG3992 | + |
|  |  |  |  | 147 | 536 | 218 | 607 | 31 | 34 | 254 | 11 | 26 | 383 | 1E-37 |  |  |
| contig_11 | 645 | 3999 | 0,4 | 743 | 1251 | 590 | 1109 | 37 | 40 | 311 | 11 | 23 | 785 | 2E-87 | NANOZOOG645 | + |
|  |  |  |  | 218 | 607 | 147 | 536 | 30 | 30 | 255 | 10 | 26 | 380 | 3E-37 |  |  |
| contig_45 | 4016 | 4020 | 1,1 | 1 | 381 | 1 | 429 | 84 | 98 | 21 | 3 | 48 | 1783 | 0E+00 | NANOZOOG4008 | + |
| contig_45 | 4020 | 4016 | 1,1 | 1 | 437 | 1 | 389 | 84 | 89 | 22 | 3 | 48 | 1815 | 0E+00 | NANOZOOG4012 | - |
| contig_45 | 4044 | 4049 | 1,5 | 1 | 562 | 1 | 540 | 96 | 96 | 1 | 1 | 22 | 2725 | 0E+00 | NANOZOOG4036 | + |
| contig_45 | 4049 | 4044 | 1,5 | 1 | 540 | 1 | 562 | 96 | 93 | 1 | 1 | 22 | 2725 | 0E+00 | NANOZOOG4041 | - |
| contig_5 | 4319 | 4337 | 0,9 | 85 | 390 | 23 | 320 | 94 | 76 | 9 | 1 | 8 | 1470 | 0E+00 | NANOZOOG4311 | - |
| contig_5 | 4337 | 4319 | 0,9 | 23 | 320 | 85 | 390 | 94 | 93 | 9 | 1 | 8 | 1470 | 0E+00 | NANOZOOG4329 | + |
| contig_5 | 4320 | 4333 | 1,8 | 1324 | 2016 | 1540 | 2279 | 89 | 33 | 3 | 3 | 83 | 3530 | 0E+00 | NANOZOOG4312 | - |
|  |  |  |  | 693 | 1206 | 865 | 1314 | 82 | 22 | 26 | 4 | 66 | 1994 | 0E+00 |  |  |
|  |  |  |  | 1 | 296 | 123 | 418 | 100 | 15 | 1 | 0 | 0 | 1641 | 0E+00 |  |  |
|  |  |  |  | 297 | 526 | 562 | 791 | 99 | 11 | 3 | 0 | 0 | 1172 | 1E-130 |  |  |
| contig_5 | 4333 | 4320 | 1,8 | 1540 | 2279 | 1324 | 2016 | 89 | 30 | 3 | 3 | 83 | 3522 | 0E+00 | NANOZOOG4325 | + |
|  |  |  |  | 862 | 1319 | 690 | 1211 | 81 | 20 | 33 | 3 | 64 | 2004 | 0E+00 |  |  |
|  |  |  |  | 123 | 418 | 1 | 296 | 100 | 13 | 1 | 0 | 0 | 1638 | 0E+00 |  |  |
|  |  |  |  | 562 | 791 | 297 | 526 | 99 | 10 | 3 | 0 | 0 | 1169 | 2E-130 |  |  |
| contig_5 | 4350 | 4351 | 0,5 | 1 | 161 | 1 | 161 | 100 | 74 | 0 | 0 | 0 | 832 | 2E-113 | NANOZOOG4342 | - |
| contig_5 | 4351 | 4350 | 0,5 | 1 | 161 | 1 | 161 | 100 | 55 | 0 | 0 | 0 | 833 | 1E-113 | NANOZOOG4343 | + |
| contig_5 | 4513 | 4514 | 0,3 | 52 | 162 | 1 | 111 | 100 | 59 | 0 | 0 | 0 | 556 | 9E-75 | NANOZOOG4503 | - |
| contig_5 | 4514 | 4513 | 0,3 | 1 | 111 | 52 | 162 | 100 | 100 | 0 | 0 | 0 | 556 | 5E-75 | NANOZOOG4504 | - |
| contig_5 | 4606 | 4608 | 1,6 | 56 | 519 | 67 | 530 | 99 | 89 | 6 | 0 | 0 | 2485 | 0E+00 | NANOZOOG4596 | + |
| contig_5 | 4608 | 4606 | 1,6 | 67 | 530 | 56 | 519 | 99 | 88 | 6 | 0 | 0 | 2485 | 0E+00 | NANOZOOG4597 | - |
| contig_5 | 4665 | 5915 | 0,5 | 1 | 364 | 21 | 377 | 50 | 95 | 164 | 10 | 23 | 815 | 2E-107 | NANOZOOG4654 | - |
| contig_7 | 5915 | 4665 | 0,5 | 21 | 377 | 1 | 364 | 50 | 93 | 162 | 11 | 23 | 832 | 7E-110 | NANOZOOG5903 | + |
| contig_5 | 4799 | 4806 | 0,6 | 5 | 359 | 1 | 357 | 69 | 93 | 72 | 7 | 46 | 1096 | 3E-150 | NANOZOOG4788 | + |
| contig_5 | 4806 | 4799 | 0,6 | 1 | 357 | 5 | 359 | 69 | 93 | 73 | 6 | 42 | 1110 | 2E-152 | NANOZOOG4795 | - |
| contig_5 | 4820 | 4821 | 1,8 | 1 | 577 | 93 | 669 | 100 | 65 | 1 | 0 | 0 | 3107 | 0E+00 | NANOZOOG4809 | - |
|  |  |  |  | 452 | 735 | 1 | 305 | 25 | 31 | 202 | 5 | 31 | 226 | 2E-19 |  |  |
| contig_5 | 4821 | 4820 | 1,8 | 93 | 669 | 1 | 577 | 100 | 86 | 1 | 0 | 0 | 3107 | 0E+00 | NANOZOOG4810 | + |
|  |  |  |  | 1 | 305 | 452 | 735 | 25 | 42 | 202 | 5 | 31 | 226 | 2E-19 |  |  |
| contig_5 | 4904 | 6916 | 0,5 | 1 | 300 | 15 | 318 | 57 | 94 | 114 | 7 | 22 | 841 | 6E-113 | NANOZOOG4893 | - |
| scaffold_49 | 6916 | 4904 | 0,5 | 15 | 318 | 1 | 300 | 57 | 88 | 114 | 7 | 22 | 841 | 6E-113 | NANOZOOG6904 | + |
| contig_5 | 4985 | 6431 | 1,8 | 4 | 550 | 127 | 633 | 66 | 49 | 140 | 4 | 50 | 1774 | 0E+00 | NANOZOOG4974 | - |
|  |  |  |  | 599 | 1033 | 722 | 1218 | 64 | 42 | 118 | 5 | 62 | 1600 | 0E+00 |  |  |
| scaffold_40 | 6431 | 4985 | 1,8 | 127 | 633 | 4 | 550 | 66 | 33 | 140 | 4 | 50 | 1821 | 0E+00 | NANOZOOG6419 | - |
|  |  |  |  | 722 | 1218 | 599 | 1033 | 64 | 28 | 118 | 5 | 62 | 1601 | 0E+00 |  |  |
| contig_62 | 5301 | 5315 | 0,2 | 2 | 209 | 7 | 165 | 41 | 60 | 73 | 4 | 49 | 363 | 1E-43 | NANOZOOG5290 | - |
| contig_62 | 5315 | 5301 | 0,2 | 7 | 165 | 2 | 209 | 41 | 96 | 73 | 4 | 49 | 362 | 1E-43 | NANOZOOG5304 | - |
| contig_62 | 5361 | 5364 | 1,0 | 1 | 359 | 30 | 375 | 87 | 92 | 1 | 6 | 47 | 1671 | 0E+00 | NANOZOOG5350 | - |
| contig_62 | 5364 | 5361 | 1,0 | 30 | 375 | 1 | 359 | 87 | 88 | 1 | 6 | 47 | 1671 | 0E+00 | NANOZOOG5353 | + |
| contig_65 | 5478 | 5479 | 0,6 | 232 | 536 | 1 | 305 | 100 | 57 | 0 | 0 | 0 | 1542 | 0E+00 | NANOZOOG5467 | + |
| contig_65 | 5479 | 5478 | 0,6 | 1 | 305 | 232 | 536 | 100 | 100 | 0 | 0 | 0 | 1542 | 0E+00 | NANOZOOG5468 | - |
| contig_65 | 5489 | 5490 | 1,8 | 50 | 611 | 1 | 552 | 98 | 66 | 1 | 1 | 10 | 2919 | 0E+00 | NANOZOOG5478 | - |
| contig_65 | 5490 | 5489 | 1,8 | 1 | 552 | 50 | 611 | 98 | 100 | 1 | 1 | 10 | 2919 | 0E+00 | NANOZOOG5479 | + |
| contig_7 | 5795 | 5796 | 1,8 | 100 | 917 | 1 | 818 | 100 | 60 | 0 | 0 | 0 | 4320 | 0E+00 | NANOZOOG5783 | + |
| contig_7 | 5796 | 5795 | 1,8 | 1 | 818 | 100 | 917 | 100 | 100 | 0 | 0 | 0 | 4320 | 0E+00 | NANOZOOG5784 | - |
| scaffold_40 | 6488 | 6489 | 1,8 | 532 | 1212 | 1 | 615 | 87 | 38 | 18 | 5 | 72 | 3034 | 0E+00 | NANOZOOG6476 | + |
| scaffold_40 | 6489 | 6488 | 1,8 | 1 | 615 | 532 | 1212 | 87 | 100 | 18 | 5 | 72 | 3034 | 0E+00 | NANOZOOG6477 | - |
| scaffold_40 | 6541 | 6542 | 0,8 | 5 | 260 | 1 | 256 | 100 | 98 | 1 | 0 | 0 | 1340 | 0E+00 | NANOZOOG6529 | + |
| scaffold_40 | 6542 | 6541 | 0,8 | 1 | 256 | 5 | 260 | 100 | 99 | 1 | 0 | 0 | 1340 | 0E+00 | NANOZOOG6530 | - |
| contig_11 | 662 | 663 | 0,3 | 2 | 137 | 1 | 178 | 75 | 99 | 2 | 1 | 42 | 621 | 6E-84 | NANOZOOG662 | - |
| contig_11 | 663 | 662 | 0,3 | 1 | 178 | 2 | 137 | 75 | 60 | 3 | 2 | 42 | 628 | 9E-85 | NANOZOOG663 | + |
| scaffold_40 | 6688 | 6689 | 0,5 | 117 | 340 | 1 | 224 | 100 | 64 | 0 | 0 | 0 | 1147 | 2E-160 | NANOZOOG6676 | + |
| scaffold_40 | 6689 | 6688 | 0,5 | 1 | 224 | 117 | 340 | 100 | 100 | 0 | 0 | 0 | 1147 | 1E-160 | NANOZOOG6677 | - |
| scaffold_49 | 6849 | 6850 | 0,4 | 237 | 413 | 3 | 179 | 100 | 39 | 0 | 0 | 0 | 887 | 6E-120 | NANOZOOG6837 | + |
| scaffold_49 | 6850 | 6849 | 0,4 | 3 | 179 | 237 | 413 | 100 | 99 | 0 | 0 | 0 | 887 | 2E-120 | NANOZOOG6838 | - |
| scaffold_49 | 6968 | 6969 | 1,0 | 1 | 302 | 1 | 302 | 100 | 91 | 1 | 0 | 0 | 1611 | 0E+00 | NANOZOOG6956 | + |
| scaffold_49 | 6969 | 6968 | 1,0 | 1 | 302 | 1 | 302 | 100 | 100 | 1 | 0 | 0 | 1611 | 0E+00 | NANOZOOG6957 | - |
| scaffold_6 | 7285 | 7300 | 0,3 | 52 | 162 | 1 | 111 | 100 | 69 | 0 | 0 | 0 | 554 | 7E-75 | NANOZOOG7271 | - |
| scaffold_6 | 7300 | 7285 | 0,3 | 1 | 111 | 52 | 162 | 100 | 100 | 0 | 0 | 0 | 554 | 4E-75 | NANOZOOG7286 | - |
| scaffold_6 | 7286 | 7301 | 0,3 | 31 | 144 | 1 | 114 | 100 | 73 | 0 | 0 | 0 | 590 | 3E-80 | NANOZOOG7272 | + |
| scaffold_6 | 7301 | 7286 | 0,3 | 1 | 114 | 31 | 144 | 100 | 90 | 0 | 0 | 0 | 590 | 2E-80 | NANOZOOG7287 | - |
| scaffold_6 | 7312 | 7313 | 1,8 | 461 | 1837 | 1 | 1371 | 100 | 74 | 0 | 2 | 6 | 7255 | 0E+00 | NANOZOOG7298 | - |
| scaffold_6 | 7313 | 7312 | 1,8 | 1 | 1371 | 461 | 1837 | 100 | 100 | 0 | 2 | 6 | 7255 | 0E+00 | NANOZOOG7299 | + |

**Supplementary Table 11.** Alignment statistics of the duplicated genes from the genome of *Rhodotorula babjevae* DBVPG 8058 identified by OrthoVenn2

| **Contig/**  **scaffold** | **Query** | **Subject** | **inflation** | **Query start** | **Query**  **end** | **Subject**  **start** | **Subject**  **end** | **%**  **identity** | **%**  **coverage** | **Mismatches** | **Gaps** | **Gap Bases** | **Score** | **E-Value** | **Gene ID** | **Strand** |
| --- | --- | --- | --- | --- | --- | --- | --- | --- | --- | --- | --- | --- | --- | --- | --- | --- |
| contig_1 | 7 | 8 | 0,7 | 1 | 215 | 65 | 279 | 100 | 73 | 0 | 0 | 0 | 1152 | 3E-161 | NANOZOOG8 | - |
| contig_1 | 8 | 7 | 0,7 | 65 | 279 | 1 | 215 | 100 | 77 | 0 | 0 | 0 | 1152 | 3E-161 | NANOZOOG9 | + |
| contig_33 | 450 | 490 | 0,1 | 1 | 87 | 10 | 79 | 45 | 47 | 31 | 1 | 17 | 189 | 3E-19 | NANOZOOG450 | - |
| contig_33 | 490 | 450 | 0,1 | 10 | 79 | 1 | 87 | 45 | 47 | 31 | 1 | 17 | 185 | 9E-19 | NANOZOOG490 | - |
| contig_38 | 699 | 700 | 0,6 | 4 | 341 | 1 | 382 | 53 | 98 | 129 | 4 | 54 | 982 | 4E-133 | NANOZOOG699 | - |
| contig_38 | 700 | 699 | 0,6 | 1 | 382 | 4 | 341 | 53 | 87 | 129 | 4 | 54 | 982 | 5E-133 | NANOZOOG700 | - |
| contig_38 | 881 | 918 | 0,3 | 1 | 131 | 1 | 131 | 99 | 100 | 1 | 0 | 0 | 657 | 8E-91 | NANOZOOG881 | + |
| contig_38 | 918 | 881 | 0,3 | 1 | 131 | 1 | 131 | 99 | 96 | 1 | 0 | 0 | 657 | 8E-91 | NANOZOOG918 | + |
| contig_40 | 1190 | 1191 | 0,8 | 117 | 447 | 1 | 333 | 99 | 74 | 0 | 1 | 2 | 1702 | 0E+00 | NANOZOOG1189 | + |
| contig_40 | 1191 | 1190 | 0,8 | 1 | 333 | 117 | 447 | 99 | 99 | 0 | 1 | 2 | 1702 | 0E+00 | NANOZOOG1190 | - |
| contig_42 | 1575 | 1576 | 1,0 | 22 | 597 | 2 | 623 | 54 | 95 | 238 | 5 | 52 | 1710 | 0E+00 | NANOZOOG1573 | + |
| contig_42 | 1576 | 1575 | 1,0 | 13 | 623 | 33 | 597 | 54 | 90 | 232 | 5 | 52 | 1694 | 0E+00 | NANOZOOG1574 | + |
| contig_42 | 1638 | 1639 | 0,2 | 3 | 90 | 1 | 88 | 98 | 63 | 2 | 0 | 0 | 443 | 1E-58 | NANOZOOG1636 | + |
| contig_42 | 1639 | 1638 | 0,2 | 1 | 88 | 3 | 90 | 98 | 100 | 2 | 0 | 0 | 443 | 6E-59 | NANOZOOG1637 | - |
| contig_42 | 1914 | 1926 | 1,1 | 1 | 581 | 1 | 621 | 66 | 78 | 167 | 6 | 42 | 1547 | 0E+00 | NANOZOOG1911 | - |
|  |  |  |  | 632 | 733 | 768 | 869 | 81 | 14 | 19 | 0 | 0 | 420 | 4E-43 |  |  |
| contig_42 | 1926 | 1914 | 1,1 | 1 | 621 | 1 | 581 | 66 | 66 | 171 | 5 | 42 | 1545 | 0E+00 | NANOZOOG1923 | + |
|  |  |  |  | 768 | 882 | 632 | 742 | 79 | 13 | 20 | 1 | 4 | 437 | 3E-45 |  |  |
| contig_42 | 2011 | 2024 | 0,2 | 1 | 280 | 1 | 278 | 40 | 98 | 161 | 4 | 10 | 352 | 2E-40 | NANOZOOG2008 | + |
| contig_42 | 2024 | 2011 | 0,2 | 1 | 278 | 1 | 280 | 35 | 94 | 156 | 5 | 36 | 354 | 8E-41 | NANOZOOG2021 | - |
| contig_45 | 2239 | 4377 | 0,3 | 1 | 236 | 1 | 227 | 49 | 96 | 112 | 3 | 9 | 489 | 1E-60 | NANOZOOG2235 | + |
| contig_65 | 4377 | 2239 | 0,3 | 1 | 227 | 1 | 236 | 49 | 64 | 112 | 3 | 9 | 486 | 4E-60 | NANOZOOG4367 | + |
| contig_47 | 2581 | 2590 | 1,6 | 1 | 800 | 1 | 754 | 67 | 93 | 206 | 9 | 64 | 2524 | 0E+00 | NANOZOOG2573 | - |
| contig_47 | 2590 | 2581 | 1,6 | 1 | 541 | 1 | 541 | 79 | 71 | 110 | 2 | 2 | 2102 | 0E+00 | NANOZOOG2582 | - |
|  |  |  |  | 609 | 754 | 631 | 800 | 57 | 19 | 49 | 1 | 24 | 507 | 2E-54 |  |  |
| contig_47 | 2601 | 2627 | 0,8 | 1 | 414 | 1 | 343 | 68 | 82 | 59 | 6 | 75 | 1356 | 0E+00 | NANOZOOG2593 | + |
| contig_47 | 2627 | 2601 | 0,8 | 1 | 343 | 1 | 414 | 68 | 99 | 60 | 6 | 75 | 1324 | 0E+00 | NANOZOOG2619 | + |
| contig_47 | 2722 | 2726 | 1,1 | 17 | 419 | 1 | 395 | 88 | 90 | 25 | 4 | 24 | 1764 | 0E+00 | NANOZOOG2714 | - |
| contig_47 | 2726 | 2722 | 1,1 | 1 | 395 | 17 | 419 | 87 | 98 | 30 | 4 | 24 | 1687 | 0E+00 | NANOZOOG2718 | + |
| contig_48 | 2976 | 2977 | 0,9 | 664 | 1001 | 1 | 338 | 100 | 29 | 0 | 0 | 0 | 1753 | 0E+00 | NANOZOOG2967 | - |
| contig_48 | 2977 | 2976 | 0,9 | 1 | 338 | 664 | 1001 | 100 | 100 | 0 | 0 | 0 | 1753 | 0E+00 | NANOZOOG2968 | + |
| contig_48 | 3002 | 3004 | 0,3 | 291 | 456 | 99 | 237 | 64 | 30 | 32 | 1 | 27 | 573 | 1E-71 | NANOZOOG2993 | + |
| contig_48 | 3004 | 3002 | 0,3 | 57 | 237 | 238 | 456 | 56 | 73 | 58 | 2 | 38 | 595 | 3E-75 | NANOZOOG2995 | + |
| contig_51 | 3445 | 3446 | 1,8 | 749 | 1312 | 91 | 654 | 100 | 33 | 1 | 0 | 0 | 2994 | 0E+00 | NANOZOOG3436 | - |
|  |  |  |  | 560 | 650 | 1 | 91 | 100 | 5 | 0 | 0 | 0 | 487 | 2E-51 |  |  |
| contig_51 | 3446 | 3445 | 1,8 | 91 | 654 | 749 | 1312 | 100 | 86 | 1 | 0 | 0 | 2994 | 0E+00 | NANOZOOG3437 | + |
|  |  |  |  | 1 | 91 | 560 | 650 | 100 | 14 | 0 | 0 | 0 | 487 | 9E-52 |  |  |
| contig_51 | 3500 | 4822 | 1,8 | 711 | 1428 | 683 | 1451 | 54 | 48 | 261 | 11 | 109 | 2049 | 0E+00 | NANOZOOG3491 | + |
|  |  |  |  | 31 | 470 | 24 | 403 | 57 | 26 | 125 | 7 | 68 | 1157 | 9E-135 |  |  |
|  |  |  |  | 572 | 701 | 404 | 575 | 45 | 9 | 53 | 1 | 42 | 359 | 2E-34 |  |  |
| contig_69 | 4822 | 3500 | 1,8 | 683 | 1239 | 711 | 1222 | 67 | 35 | 140 | 2 | 45 | 1964 | 0E+00 | NANOZOOG4811 | + |
|  |  |  |  | 24 | 403 | 31 | 470 | 57 | 26 | 125 | 7 | 68 | 1154 | 3E-134 |  |  |
|  |  |  |  | 404 | 575 | 572 | 701 | 45 | 9 | 53 | 1 | 42 | 310 | 1E-28 |  |  |
| contig_53 | 3517 | 7028 | 0,7 | 1 | 224 | 29 | 252 | 98 | 100 | 5 | 0 | 0 | 1118 | 1E-157 | NANOZOOG3508 | - |
| contig_86 | 7028 | 3517 | 0,7 | 29 | 252 | 1 | 224 | 98 | 89 | 5 | 0 | 0 | 1118 | 1E-157 | NANOZOOG6994 | - |
| contig_69 | 4979 | 4980 | 1,8 | 1 | 620 | 51 | 670 | 100 | 93 | 1 | 0 | 0 | 3319 | 0E+00 | NANOZOOG4967 | + |
|  |  |  |  | 505 | 669 | 6 | 175 | 28 | 24 | 114 | 3 | 9 | 175 | 2E-13 |  |  |
| contig_69 | 4980 | 4979 | 1,8 | 51 | 670 | 1 | 620 | 100 | 93 | 1 | 0 | 0 | 3319 | 0E+00 | NANOZOOG4968 | - |
|  |  |  |  | 6 | 175 | 505 | 669 | 28 | 24 | 114 | 3 | 9 | 175 | 2E-13 |  |  |
| contig_69 | 5060 | 5062 | 1,8 | 204 | 999 | 2 | 956 | 76 | 80 | 69 | 9 | 159 | 3159 | 0E+00 | NANOZOOG5048 | + |
| contig_69 | 5062 | 5060 | 1,8 | 2 | 956 | 204 | 999 | 76 | 83 | 69 | 9 | 159 | 3148 | 0E+00 | NANOZOOG5049 | - |
| contig_70 | 5308 | 5318 | 0,3 | 1 | 122 | 1 | 122 | 100 | 76 | 0 | 0 | 0 | 620 | 8E-85 | NANOZOOG5294 | - |
| contig_70 | 5318 | 5308 | 0,3 | 1 | 122 | 1 | 122 | 100 | 100 | 0 | 0 | 0 | 620 | 6E-85 | NANOZOOG5304 | + |
| contig_70 | 5308 | 6580 | 0,3 | 5 | 159 | 1 | 156 | 84 | 96 | 20 | 2 | 5 | 615 | 1E-83 | NANOZOOG5294 | - |
| contig_82 | 6580 | 5308 | 0,3 | 1 | 156 | 5 | 159 | 84 | 97 | 21 | 2 | 5 | 597 | 7E-81 | NANOZOOG6562 | + |
| contig_70 | 5329 | 5332 | 1,8 | 156 | 1230 | 1 | 1061 | 99 | 50 | 0 | 1 | 14 | 5626 | 0E+00 | NANOZOOG5315 | - |
| contig_70 | 5332 | 5329 | 1,8 | 1 | 1061 | 156 | 1230 | 99 | 100 | 0 | 1 | 14 | 5626 | 0E+00 | NANOZOOG5318 | + |
| contig_73 | 5763 | 5786 | 1,8 | 77 | 786 | 1 | 709 | 89 | 84 | 31 | 3 | 47 | 3375 | 0E+00 | NANOZOOG5747 | + |
| contig_73 | 5786 | 5763 | 1,8 | 1 | 709 | 77 | 786 | 89 | 97 | 31 | 3 | 47 | 3376 | 0E+00 | NANOZOOG5770 | + |
| contig_74 | 5904 | 5905 | 0,5 | 270 | 534 | 1 | 265 | 100 | 49 | 0 | 0 | 0 | 1317 | 0E+00 | NANOZOOG5888 | + |
| contig_74 | 5905 | 5904 | 0,5 | 1 | 265 | 270 | 534 | 100 | 100 | 0 | 0 | 0 | 1317 | 0E+00 | NANOZOOG5889 | - |
| contig_74 | 5915 | 5916 | 1,8 | 50 | 609 | 1 | 549 | 98 | 59 | 1 | 1 | 11 | 2905 | 0E+00 | NANOZOOG5899 | - |
| contig_74 | 5916 | 5915 | 1,8 | 1 | 549 | 50 | 609 | 98 | 100 | 1 | 1 | 11 | 2905 | 0E+00 | NANOZOOG5900 | + |
| contig_77 | 6501 | 6510 | 1,8 | 1 | 750 | 1 | 703 | 91 | 94 | 18 | 2 | 47 | 3469 | 0E+00 | NANOZOOG6483 | - |
| contig_77 | 6510 | 6501 | 1,8 | 1 | 703 | 1 | 750 | 91 | 100 | 18 | 2 | 47 | 3469 | 0E+00 | NANOZOOG6492 | + |
| contig_84 | 6685 | 6687 | 0,7 | 2 | 464 | 3 | 482 | 53 | 98 | 200 | 4 | 29 | 1155 | 1E-155 | NANOZOOG6667 | - |
| contig_84 | 6687 | 6685 | 0,7 | 3 | 482 | 2 | 464 | 53 | 94 | 194 | 5 | 37 | 1214 | 9E-165 | NANOZOOG6669 | - |
| scaffold_52 | 7488 | 7489 | 1,2 | 80 | 443 | 1 | 368 | 98,913 | 80,531 | 0 | 2 | 4 | 1911 | 0E+00 | NANOZOOG7454 | + |
| scaffold_52 | 7489 | 7488 | 1,2 | 1 | 368 | 80 | 443 | 98,913 | 98,913 | 0 | 2 | 4 | 1911 | 0E+00 | NANOZOOG7455 | - |
| scaffold_52 | 7497 | 7498 | 1,4 | 1 | 501 | 10 | 515 | 99,0119 | 100 | 0 | 1 | 5 | 2509 | 0E+00 | NANOZOOG7463 | - |
| scaffold_52 | 7498 | 7497 | 1,4 | 10 | 515 | 1 | 501 | 99,0119 | 97,2816 | 0 | 1 | 5 | 2509 | 0E+00 | NANOZOOG7464 | + |

**Supplementary Table 12.** Alignment statistics of the duplicated genes from the genome of *Rhodotorula babjevae* CBS 7808 identified by BLASTp

| **Contig/**  **scaffold** | **Query** | **Subject** | **Query**  **start** | **Query**  **stop** | **Subject**  **start** | **Subject**  **stop** | **%**  **identity** | **%**  **coverage** | **Mismatches** | **Gaps** | **Gap Bases** | **Score** | **E-Value** | **Gene ID** | **Strad** |
| --- | --- | --- | --- | --- | --- | --- | --- | --- | --- | --- | --- | --- | --- | --- | --- |
| contig_10 | 24 | 38 | 1 | 602 | 1 | 578 | 74 | 92 | 131 | 3 | 24 | 2222 | 0E+00 | NANOZOOG25 | - |
| contig_10 | 38 | 24 | 1 | 578 | 1 | 602 | 74 | 75 | 131 | 3 | 24 | 2256 | 0E+00 | NANOZOOG39 | + |
| contig_10 | 84 | 701 | 12 | 359 | 1 | 401 | 68 | 94 | 66 | 7 | 63 | 1338 | 0E+00 | NANOZOOG85 | - |
| contig_11 | 701 | 84 | 1 | 401 | 12 | 359 | 68 | 84 | 66 | 7 | 63 | 1338 | 0E+00 | NANOZOOG701 | - |
| contig_10 | 122 | 123 | 8 | 190 | 1 | 211 | 84 | 91 | 5 | 1 | 28 | 873 | 2E-121 | NANOZOOG123 | + |
| contig_10 | 123 | 122 | 1 | 211 | 8 | 190 | 87 | 87 | 0 | 1 | 28 | 905 | 3E-126 | NANOZOOG124 | - |
| contig_10 | 326 | 327 | 1 | 330 | 1 | 359 | 73 | 94 | 67 | 4 | 29 | 1258 | 3E-174 | NANOZOOG326 | - |
| contig_10 | 327 | 326 | 1 | 359 | 1 | 330 | 72 | 79 | 70 | 4 | 29 | 1260 | 2E-174 | NANOZOOG327 | - |
| contig_12 | 801 | 812 | 1 | 280 | 1 | 304 | 89 | 82 | 8 | 1 | 24 | 1379 | 0E+00 | NANOZOOG801 | + |
| contig_12 | 812 | 801 | 1 | 304 | 1 | 280 | 89 | 91 | 8 | 1 | 24 | 1379 | 0E+00 | NANOZOOG812 | - |
| contig_12 | 830 | 831 | 13 | 178 | 1 | 166 | 100 | 93 | 0 | 0 | 0 | 894 | 1E-125 | NANOZOOG830 | + |
| contig_12 | 831 | 830 | 1 | 166 | 13 | 178 | 100 | 97 | 0 | 0 | 0 | 894 | 1E-125 | NANOZOOG831 | - |
| contig_30 | 1409 | 5744 | 1 | 1354 | 3 | 1340 | 90 | 99 | 114 | 4 | 20 | 5728 | 0E+00 | NANOZOOG1409 | - |
| contig_66 | 5744 | 1409 | 3 | 1340 | 1 | 1354 | 90 | 100 | 112 | 4 | 20 | 5706 | 0E+00 | NANOZOOG5732 | + |
| contig_66 | 5744 | 2182 | 1 | 1340 | 1 | 1301 | 85 | 96 | 129 | 7 | 75 | 5233 | 0E+00 | NANOZOOG5732 | + |
| contig_31 | 2182 | 5744 | 1 | 1301 | 1 | 1340 | 85 | 98 | 130 | 7 | 75 | 5228 | 0E+00 | NANOZOOG2177 | + |
| contig_30 | 1409 | 2182 | 1 | 1354 | 3 | 1301 | 87 | 96 | 112 | 5 | 59 | 5497 | 0E+00 | NANOZOOG1409 | - |
| contig_31 | 2182 | 1409 | 3 | 1301 | 1 | 1354 | 87 | 99 | 111 | 5 | 59 | 5492 | 0E+00 | NANOZOOG2177 | + |
| contig_30 | 1471 | 1488 | 73 | 364 | 1 | 256 | 87 | 70 | 3 | 2 | 36 | 1222 | 5E-171 | NANOZOOG1470 | - |
| contig_30 | 1488 | 1471 | 1 | 256 | 73 | 364 | 87 | 100 | 3 | 2 | 36 | 1222 | 4E-171 | NANOZOOG1487 | + |
| contig_30 | 1500 | 1501 | 15 | 276 | 30 | 296 | 76 | 94 | 55 | 4 | 9 | 1038 | 9E-144 | NANOZOOG1499 | - |
| contig_30 | 1501 | 1500 | 30 | 296 | 15 | 276 | 76 | 86 | 55 | 4 | 9 | 1037 | 1E-143 | NANOZOOG1500 | - |
| contig_30 | 1515 | 1516 | 1 | 189 | 31 | 219 | 100 | 99 | 0 | 0 | 0 | 983 | 3E-138 | NANOZOOG1514 | + |
| contig_30 | 1516 | 1515 | 31 | 219 | 1 | 189 | 100 | 86 | 0 | 0 | 0 | 983 | 3E-138 | NANOZOOG1515 | - |
| contig_30 | 1851 | 1892 | 42 | 284 | 1 | 209 | 84 | 70 | 1 | 4 | 38 | 992 | 6E-138 | NANOZOOG1848 | - |
| contig_30 | 1892 | 1851 | 1 | 209 | 42 | 284 | 84 | 99 | 1 | 4 | 38 | 992 | 4E-138 | NANOZOOG1889 | - |
| contig_31 | 2140 | 2163 | 1 | 856 | 1 | 837 | 91 | 97 | 52 | 2 | 25 | 4077 | 0E+00 | NANOZOOG2135 | + |
| contig_31 | 2163 | 2140 | 1 | 837 | 1 | 856 | 91 | 100 | 52 | 2 | 25 | 4077 | 0E+00 | NANOZOOG2158 | + |
| contig_36 | 2615 | 2616 | 16 | 325 | 1 | 266 | 86 | 75 | 0 | 1 | 44 | 959 | 5E-131 | NANOZOOG2609 | + |
| contig_36 | 2616 | 2615 | 1 | 266 | 16 | 325 | 86 | 100 | 0 | 1 | 44 | 964 | 6E-132 | NANOZOOG2610 | - |
| contig_37 | 2717 | 2727 | 1 | 574 | 1 | 627 | 79 | 100 | 80 | 2 | 53 | 2379 | 0E+00 | NANOZOOG2711 | - |
| contig_37 | 2727 | 2717 | 1 | 627 | 1 | 574 | 79 | 92 | 77 | 2 | 53 | 2408 | 0E+00 | NANOZOOG2721 | + |
| contig_38 | 2814 | 2815 | 2 | 354 | 1 | 366 | 96 | 99 | 0 | 1 | 13 | 1752 | 0E+00 | NANOZOOG2808 | - |
| contig_38 | 2815 | 2814 | 1 | 366 | 2 | 354 | 96 | 96 | 0 | 1 | 13 | 1752 | 0E+00 | NANOZOOG2809 | + |
| contig_38 | 2854 | 2877 | 1 | 481 | 1 | 476 | 85 | 97 | 67 | 2 | 7 | 1475 | 0E+00 | NANOZOOG2848 | - |
| contig_38 | 2877 | 2854 | 1 | 469 | 1 | 474 | 85 | 78 | 66 | 2 | 7 | 1502 | 0E+00 | NANOZOOG2871 | + |
| contig_38 | 3041 | 3043 | 153 | 610 | 3 | 460 | 100 | 72 | 1 | 0 | 0 | 2369 | 0E+00 | NANOZOOG3035 | + |
| contig_38 | 3043 | 3041 | 3 | 460 | 153 | 610 | 100 | 100 | 1 | 0 | 0 | 2369 | 0E+00 | NANOZOOG3037 | - |
| contig_39 | 3191 | 3192 | 98 | 659 | 1 | 534 | 93 | 76 | 12 | 3 | 28 | 2647 | 0E+00 | NANOZOOG3184 | - |
| contig_39 | 3192 | 3191 | 1 | 534 | 98 | 659 | 93 | 100 | 12 | 3 | 28 | 2647 | 0E+00 | NANOZOOG3185 | + |
| contig_39 | 3262 | 3263 | 24 | 450 | 1 | 421 | 79 | 92 | 73 | 3 | 16 | 1672 | 0E+00 | NANOZOOG3255 | - |
| contig_39 | 3263 | 3262 | 1 | 421 | 24 | 450 | 79 | 99 | 73 | 3 | 16 | 1662 | 0E+00 | NANOZOOG3256 | - |
| contig_45 | 4016 | 4020 | 1 | 381 | 1 | 429 | 84 | 98 | 21 | 3 | 48 | 1783 | 0E+00 | NANOZOOG4008 | + |
| contig_45 | 4020 | 4016 | 1 | 437 | 1 | 389 | 84 | 89 | 22 | 3 | 48 | 1815 | 0E+00 | NANOZOOG4012 | - |
| contig_45 | 4044 | 4049 | 1 | 562 | 1 | 540 | 96 | 96 | 1 | 1 | 22 | 2725 | 0E+00 | NANOZOOG4036 | + |
| contig_45 | 4049 | 4044 | 1 | 540 | 1 | 562 | 96 | 93 | 1 | 1 | 22 | 2725 | 0E+00 | NANOZOOG4041 | - |
| contig_5 | 4319 | 4337 | 85 | 390 | 23 | 320 | 94 | 76 | 9 | 1 | 8 | 1470 | 0E+00 | NANOZOOG4311 | - |
| contig_5 | 4337 | 4319 | 23 | 320 | 85 | 390 | 94 | 93 | 9 | 1 | 8 | 1470 | 0E+00 | NANOZOOG4329 | + |
| contig_5 | 4341 | 4342 | 16 | 520 | 1 | 495 | 98 | 95 | 0 | 1 | 10 | 2477 | 0E+00 | NANOZOOG4333 | + |
| contig_5 | 4342 | 4341 | 1 | 495 | 16 | 520 | 98 | 100 | 0 | 1 | 10 | 2477 | 0E+00 | NANOZOOG4334 | - |
| contig_62 | 5361 | 5364 | 1 | 359 | 30 | 375 | 87 | 92 | 1 | 6 | 47 | 1671 | 0E+00 | NANOZOOG5350 | - |
| contig_62 | 5364 | 5361 | 30 | 375 | 1 | 359 | 87 | 88 | 1 | 6 | 47 | 1671 | 0E+00 | NANOZOOG5353 | + |
| contig_7 | 5765 | 5781 | 2 | 401 | 85 | 501 | 78 | 89 | 72 | 3 | 19 | 1543 | 0E+00 | NANOZOOG5753 | + |
| contig_7 | 5781 | 5765 | 84 | 501 | 1 | 401 | 78 | 80 | 72 | 3 | 19 | 1590 | 0E+00 | NANOZOOG5769 | - |
| contig_7 | 5929 | 5930 | 1 | 444 | 147 | 590 | 100 | 100 | 0 | 0 | 0 | 2286 | 0E+00 | NANOZOOG5917 | + |
| contig_7 | 5930 | 5929 | 147 | 590 | 1 | 444 | 100 | 75 | 0 | 0 | 0 | 2286 | 0E+00 | NANOZOOG5918 | - |
| scaffold_40 | 6541 | 6542 | 5 | 260 | 1 | 256 | 100 | 98 | 1 | 0 | 0 | 1340 | 0E+00 | NANOZOOG6529 | + |
| scaffold_40 | 6542 | 6541 | 1 | 256 | 5 | 260 | 100 | 99 | 1 | 0 | 0 | 1340 | 0E+00 | NANOZOOG6530 | - |
| scaffold_49 | 6968 | 6969 | 1 | 302 | 1 | 302 | 100 | 91 | 1 | 0 | 0 | 1611 | 0E+00 | NANOZOOG6956 | + |
| scaffold_49 | 6969 | 6968 | 1 | 302 | 1 | 302 | 100 | 100 | 1 | 0 | 0 | 1611 | 0E+00 | NANOZOOG6957 | - |
| scaffold_6 | 7144 | 7145 | 9 | 163 | 1 | 153 | 95 | 91 | 5 | 1 | 2 | 767 | 1E-106 | NANOZOOG7132 | + |
| scaffold_6 | 7145 | 7144 | 1 | 153 | 9 | 163 | 95 | 100 | 5 | 1 | 2 | 767 | 1E-106 | NANOZOOG7133 | + |
| scaffold_6 | 7266 | 7271 | 1 | 353 | 76 | 407 | 86 | 93 | 24 | 2 | 27 | 1381 | 0E+00 | NANOZOOG7252 | + |
| scaffold_6 | 7271 | 7266 | 76 | 407 | 1 | 353 | 86 | 81 | 24 | 2 | 27 | 1405 | 0E+00 | NANOZOOG7257 | - |
| scaffold_6 | 7312 | 7313 2 | 461 | 1837 | 1 | 1371 | 100 | 74 | 0 | 2 | 6 | 7255 | 0E+00 | NANOZOOG7298 | - |
| scaffold_6 | 7313 | 7312 | 1 | 257 | 196 | 452 | 100 | 97 | 0 | 0 | 0 | 1350 | 2E-174 | NANOZOOG7299 | + |
| contig_5 | 4606 | 4608 | 56 | 519 | 67 | 530 | 99 | 89 | 6 | 0 | 0 | 2485 | 0E+00 | NANOZOOG4596 | + |
| contig_5 | 4608 | 4606 | 67 | 530 | 56 | 519 | 99 | 88 | 6 | 0 | 0 | 2485 | 0E+00 | NANOZOOG4597 | - |
| contig_28 | 1276 | 1280 | 1 | 590 | 1 | 595 | 80 | 96 | 71 | 7 | 55 | 2390 | 0E+00 | NANOZOOG1276 | - |
| contig_28 | 1280 | 1276 | 1 | 595 | 1 | 590 | 80 | 95 | 71 | 8 | 51 | 2317 | 0E+00 | NANOZOOG1280 | + |
| scaffold_6 | 7498 | 7497 | 1 | 399 | 1 | 355 | 89 | 78 | 0 | 1 | 44 | 1870 | 0E+00 | NANOZOOG7483 | + |
| scaffold_6 | 7497 | 7498 | 1 | 355 | 1 | 399 | 89 | 100 | 0 | 1 | 44 | 1870 | 0E+00 | NANOZOOG7482 | - |

**Supplementary Table 13.** Alignment statistics of the duplicated genes from the genome of *Rhodotorula babjevae* DBVPG 8058 identified by BLASTp

| **Contig/**  **scaffold** | **Query** | **Subject** | **Query**  **start** | **Query**  **stop** | **Subject**  **start** | **Subject**  **stop** | **%**  **identity** | **%**  **coverage** | **Mismatches** | **Gaps** | **Gap Bases** | **Score** | **E-Value** | **Gene ID** | **Sense** |
| --- | --- | --- | --- | --- | --- | --- | --- | --- | --- | --- | --- | --- | --- | --- | --- |
| contig_1 | 7 | 8 | 1 | 215 | 65 | 279 | 100 | 73 | 0 | 0 | 0 | 1152 | 3E-161 | NANOZOOG8 | - |
| contig_1 | 8 | 7 | 65 | 279 | 1 | 215 | 100 | 77 | 0 | 0 | 0 | 1152 | 3E-161 | NANOZOOG9 | + |
| contig_40 | 1190 | 1191 | 117 | 447 | 1 | 333 | 99 | 74 | 0 | 1 | 2 | 1702 | 0E+00 | NANOZOOG1189 | + |
| contig_40 | 1191 | 1190 | 1 | 333 | 117 | 447 | 99 | 99 | 0 | 1 | 2 | 1702 | 0E+00 | NANOZOOG1190 | - |
| contig_42 | 1785 | 1823 | 21 | 253 | 1 | 254 | 86 | 84 | 6 | 2 | 29 | 901 | 2E-123 | NANOZOOG1782 | + |
| contig_42 | 1823 | 1785 | 1 | 254 | 21 | 253 | 86 | 85 | 6 | 2 | 29 | 966 | 2E-133 | NANOZOOG1820 | + |
| contig_45 | 2269 | 2270 | 1 | 341 | 74 | 414 | 98 | 80 | 8 | 0 | 0 | 1769 | 0E+00 | NANOZOOG2265 | + |
| contig_45 | 2270 | 2269 | 74 | 414 | 1 | 341 | 98 | 82 | 8 | 0 | 0 | 1769 | 0E+00 | NANOZOOG2266 | - |
| contig_47 | 2722 | 2726 | 17 | 419 | 1 | 395 | 88 | 90 | 25 | 4 | 24 | 1764 | 0E+00 | NANOZOOG2714 | - |
| contig_47 | 2726 | 2722 | 1 | 395 | 17 | 419 | 87 | 98 | 30 | 4 | 24 | 1687 | 0E+00 | NANOZOOG2718 | + |
| contig_48 | 2853 | 2854 | 137 | 580 | 1 | 444 | 100 | 77 | 0 | 0 | 0 | 2285 | 0E+00 | NANOZOOG2845 | + |
| contig_48 | 2854 | 2853 | 1 | 444 | 137 | 580 | 100 | 100 | 0 | 0 | 0 | 2285 | 0E+00 | NANOZOOG2846 | - |
| contig_51 | 3245 | 3246 | 1 | 187 | 36 | 222 | 100 | 94 | 0 | 0 | 0 | 932 | 3E-130 | NANOZOOG3236 | - |
| contig_51 | 3246 | 3245 | 36 | 222 | 1 | 187 | 100 | 84 | 0 | 0 | 0 | 932 | 4E-130 | NANOZOOG3237 | + |
| contig_51 | 3354 | 3355 | 98 | 459 | 1 | 359 | 99 | 76 | 1 | 2 | 3 | 1900 | 0E+00 | NANOZOOG3345 | + |
| contig_51 | 3355 | 3354 | 1 | 359 | 98 | 459 | 99 | 100 | 1 | 2 | 3 | 1900 | 0E+00 | NANOZOOG3346 | - |
| contig_51 | 3393 | 3394 | 1 | 233 | 37 | 269 | 100 | 93 | 1 | 0 | 0 | 1221 | 1E-172 | NANOZOOG3384 | + |
| contig_51 | 3394 | 3393 | 37 | 269 | 1 | 233 | 100 | 87 | 1 | 0 | 0 | 1221 | 1E-172 | NANOZOOG3385 | - |
| contig_53 | 3517 | 7028 | 1 | 224 | 29 | 252 | 98 | 100 | 5 | 0 | 0 | 1118 | 1E-157 | NANOZOOG3508 | - |
| contig_86 | 7028 | 3517 | 29 | 252 | 1 | 224 | 98 | 89 | 5 | 0 | 0 | 1118 | 1E-157 | NANOZOOG6994 | - |
| contig_53 | 3695 | 3696 | 1 | 173 | 37 | 209 | 100 | 97 | 0 | 0 | 0 | 910 | 2E-127 | NANOZOOG3686 | + |
| contig_53 | 3696 | 3695 | 37 | 209 | 1 | 173 | 100 | 83 | 0 | 0 | 0 | 910 | 2E-127 | NANOZOOG3687 | - |
| contig_54 | 3739 | 3743 | 1 | 439 | 1 | 364 | 75 | 82 | 34 | 4 | 75 | 1598 | 0E+00 | NANOZOOG3730 | + |
| contig_54 | 3743 | 3739 | 1 | 361 | 1 | 436 | 75 | 99 | 36 | 4 | 75 | 1486 | 0E+00 | NANOZOOG3734 | - |
| contig_69 | 4979 | 4980 | 1 | 620 | 51 | 670 | 100 | 93 | 1 | 0 | 0 | 3319 | 0E+00 | NANOZOOG4967 | + |
| contig_69 | 4980 | 4979 | 51 | 670 | 1 | 620 | 100 | 93 | 1 | 0 | 0 | 3319 | 0E+00 | NANOZOOG4968 | - |
| contig_69 | 5060 | 5062 | 204 | 999 | 2 | 956 | 76 | 80 | 69 | 9 | 159 | 3159 | 0E+00 | NANOZOOG5048 | + |
| contig_69 | 5062 | 5060 | 2 | 956 | 204 | 999 | 76 | 83 | 69 | 9 | 159 | 3148 | 0E+00 | NANOZOOG5049 | - |
| contig_70 | 5308 | 6580 | 5 | 159 | 1 | 156 | 84 | 96 | 20 | 2 | 5 | 615 | 1E-83 | NANOZOOG5294 | - |
| contig_82 | 6580 | 5308 | 1 | 156 | 5 | 159 | 84 | 97 | 21 | 2 | 5 | 597 | 7E-81 | NANOZOOG6562 | + |
| contig_71 | 5441 | 5451 | 1 | 475 | 1 | 475 | 87 | 83 | 62 | 0 | 0 | 2050 | 0E+00 | NANOZOOG5427 | - |
| contig_71 | 5451 | 5441 | 1 | 475 | 1 | 475 | 87 | 100 | 62 | 0 | 0 | 2113 | 0E+00 | NANOZOOG5437 | + |
| contig_73 | 5763 | 5786 | 77 | 786 | 1 | 709 | 89 | 84 | 31 | 3 | 47 | 3375 | 0E+00 | NANOZOOG5747 | + |
| contig_73 | 5786 | 5763 | 1 | 709 | 77 | 786 | 89 | 97 | 31 | 3 | 47 | 3376 | 0E+00 | NANOZOOG5770 | + |
| contig_75 | 6248 | 6249 | 7 | 379 | 1 | 363 | 97 | 93 | 0 | 1 | 10 | 1907 | 0E+00 | NANOZOOG6230 | - |
| contig_75 | 6249 | 6248 | 1 | 363 | 7 | 379 | 97 | 100 | 0 | 1 | 10 | 1907 | 0E+00 | NANOZOOG6231 | + |
| contig_77 | 6501 | 6510 | 1 | 750 | 1 | 703 | 91 | 94 | 18 | 2 | 47 | 3469 | 0E+00 | NANOZOOG6483 | - |
| contig_77 | 6510 | 6501 | 1 | 703 | 1 | 750 | 91 | 100 | 18 | 2 | 47 | 3469 | 0E+00 | NANOZOOG6492 | + |
| scaffold_52 | 7488 | 7489 | 80 | 443 | 1 | 368 | 99 | 81 | 0 | 2 | 4 | 1911 | 0E+00 | NANOZOOG7454 | + |
| scaffold_52 | 7489 | 7488 | 1 | 368 | 80 | 443 | 99 | 99 | 0 | 2 | 4 | 1911 | 0E+00 | NANOZOOG7455 | - |
| scaffold_52 | 7497 | 7498 | 1 | 501 | 10 | 515 | 99 | 100 | 0 | 1 | 5 | 2509 | 0E+00 | NANOZOOG7463 | - |
| scaffold_52 | 7498 | 7497 | 10 | 515 | 1 | 501 | 99 | 97 | 0 | 1 | 5 | 2509 | 0E+00 | NANOZOOG7464 | + |

a)

b)

**Supplementary Figure 1.** Allele frequency values of single nucleotide polymorphisms (SNP) in *Rhodotorula babjevae*. (a) *R. babjevae* CBS 7808; (b) *R. babjevae* DBVPG 8058.


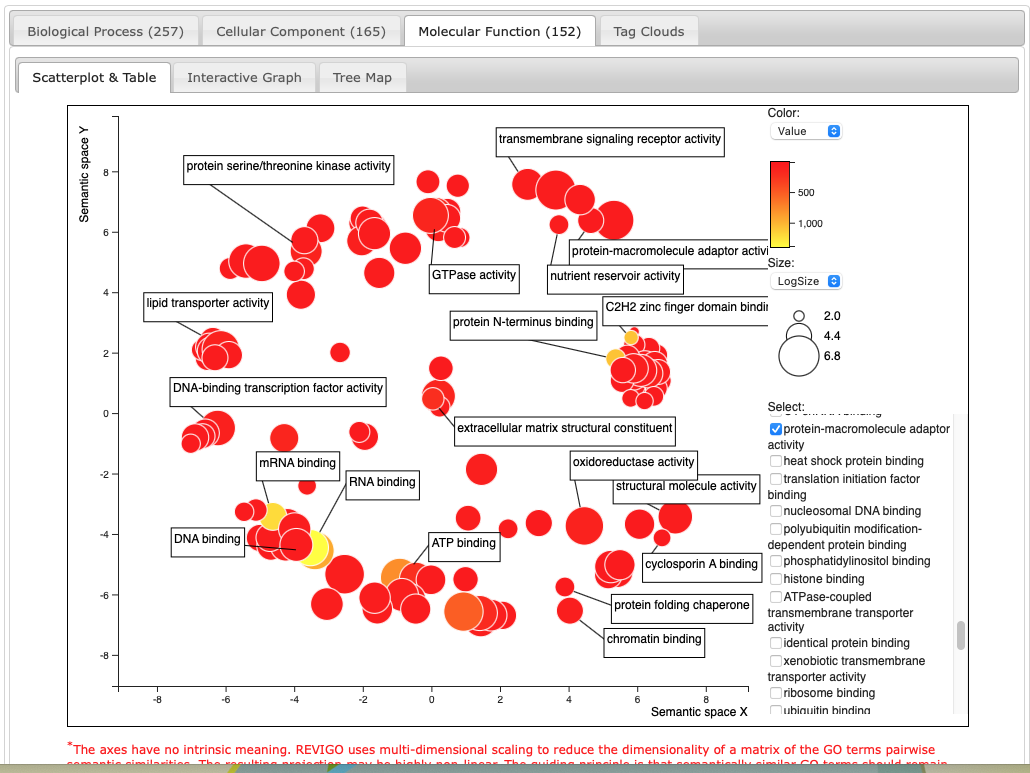


**
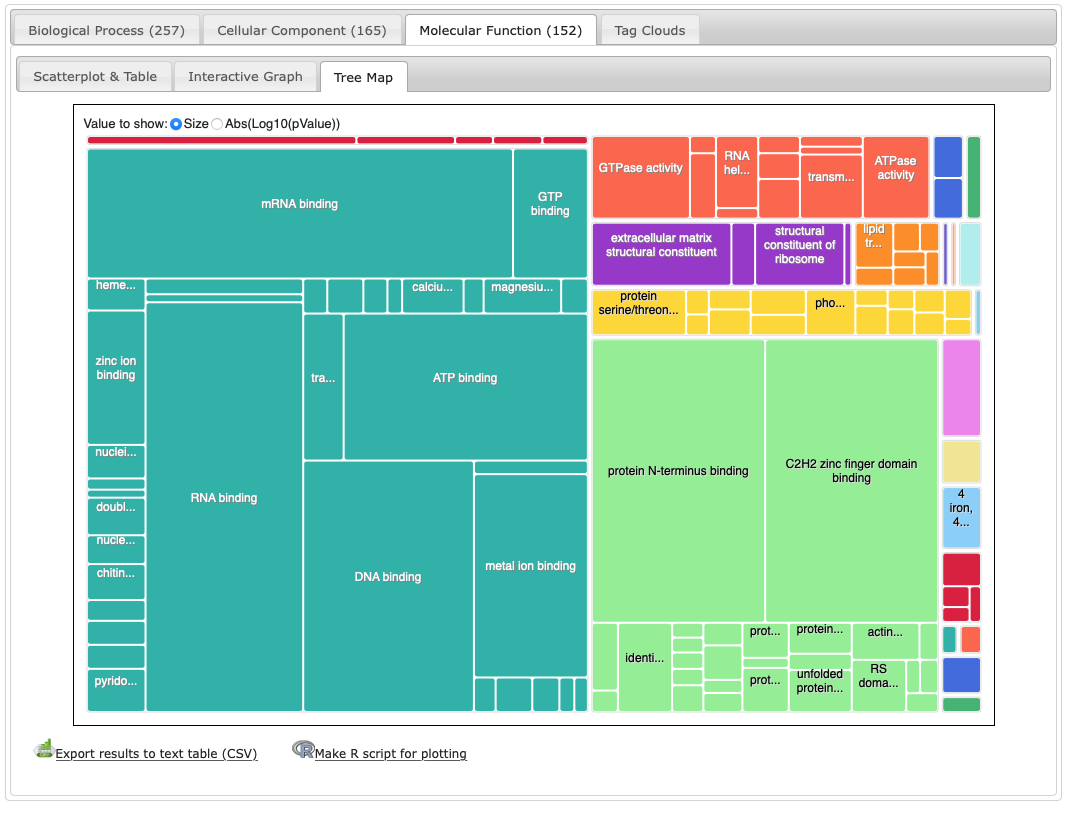
**

a)


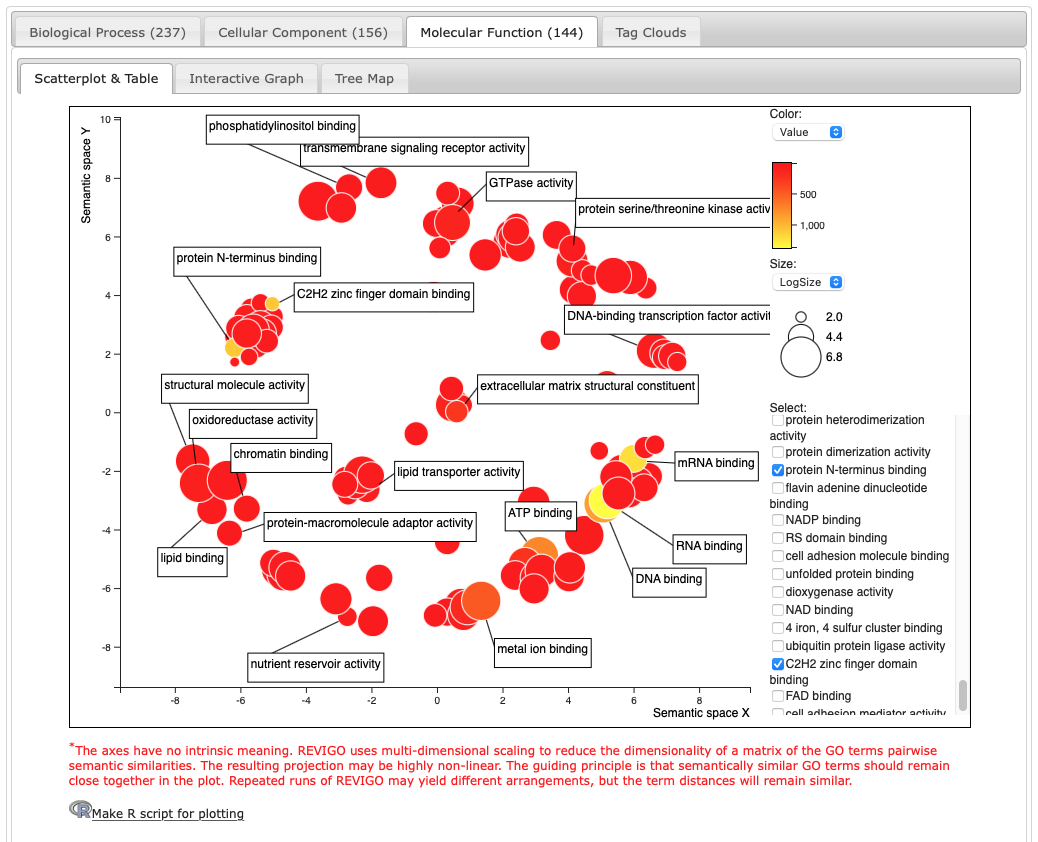

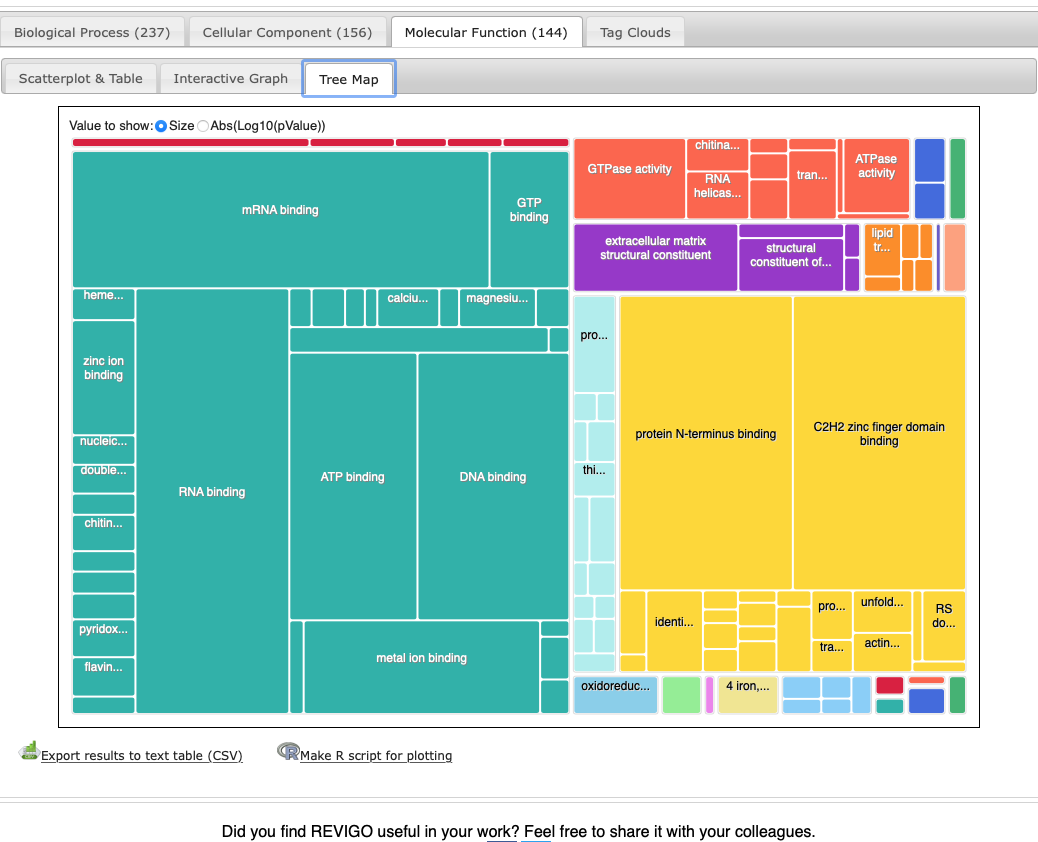


b)

**Supplementary Figure 2.** Gene Ontology (GO) term summary related to the GO topic: molecular functions. (a) *Rhodotorula babjevae* CBS 7808; (b) *R. babjevae* DBVPG 8058.

**
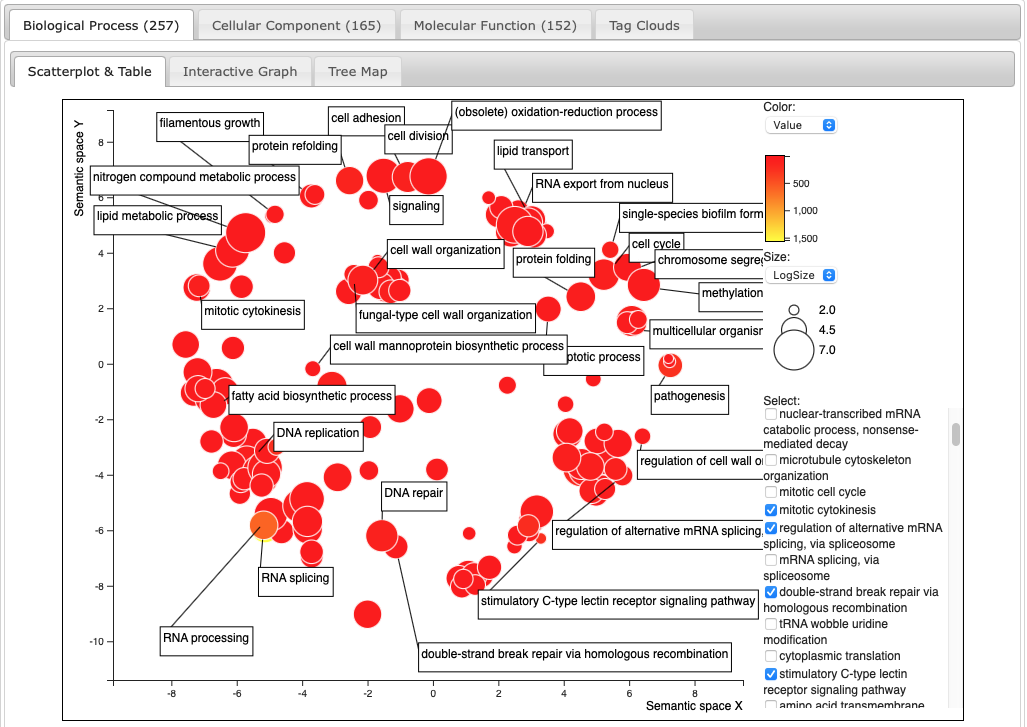
**

**
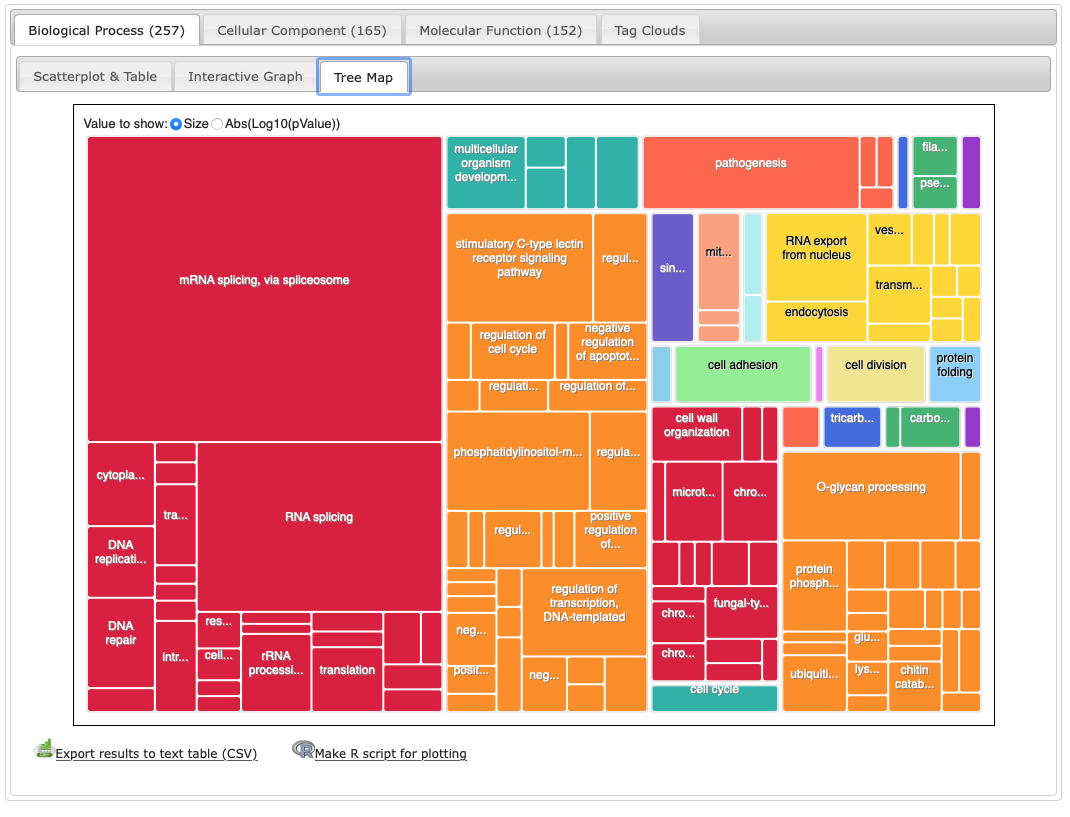
**

a)


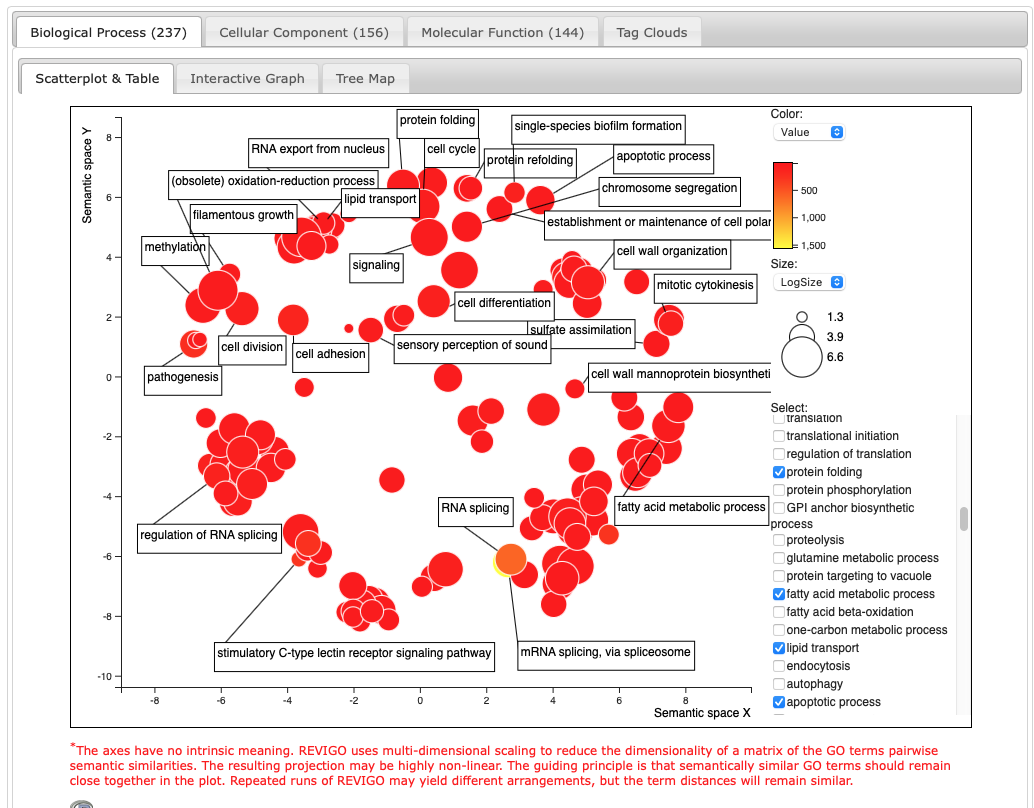

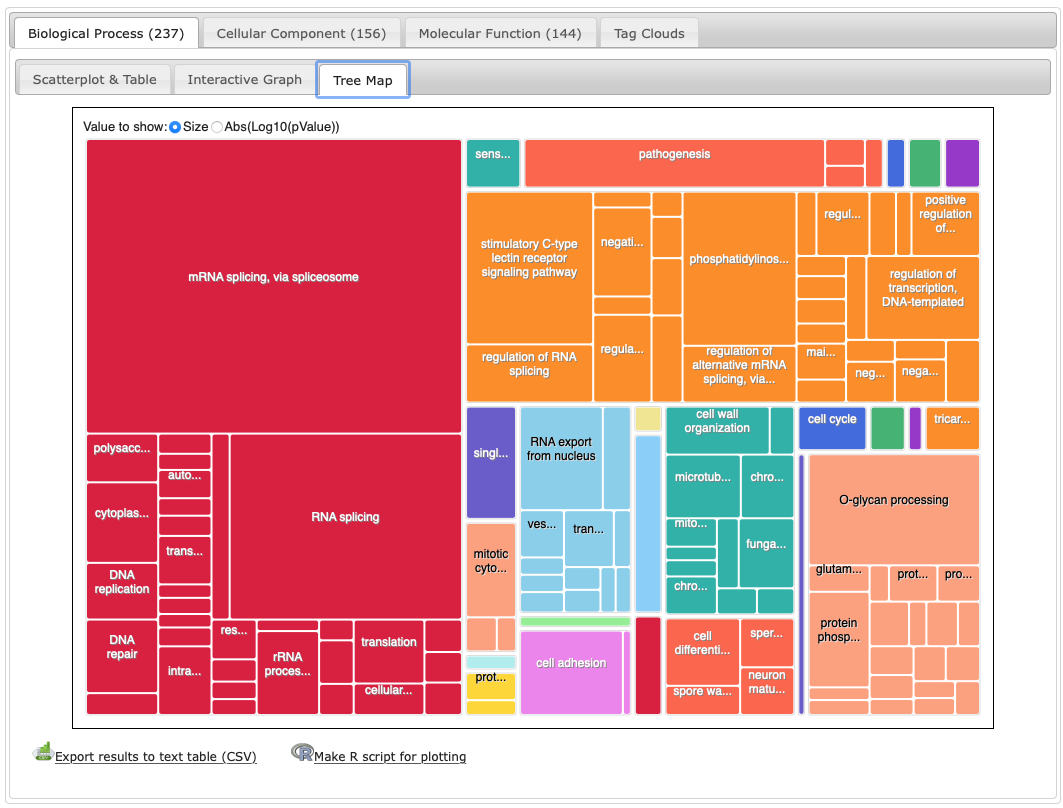


b)

**Supplementary Figure 3.** Gene Ontology (GO) term summaries belonging to the GO topic: biological processes. (a) *Rhodotorula babjevae* CBS 7808; (b) *R. babjevae* DBVPG 8058.

**
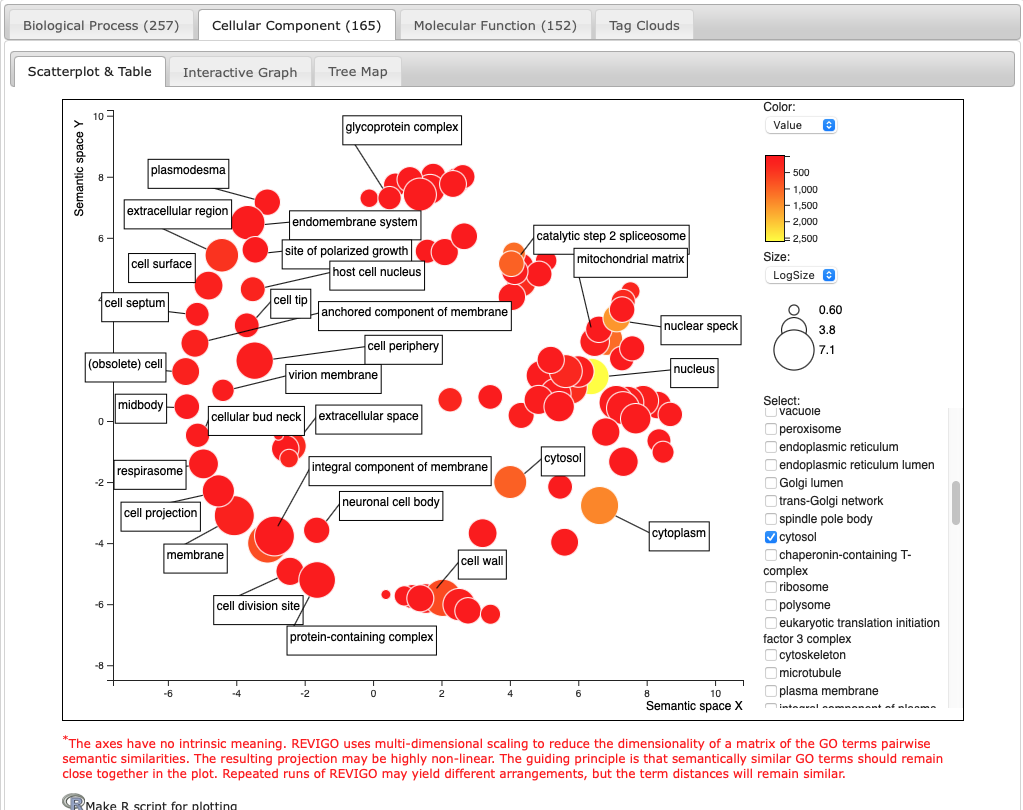
**

**
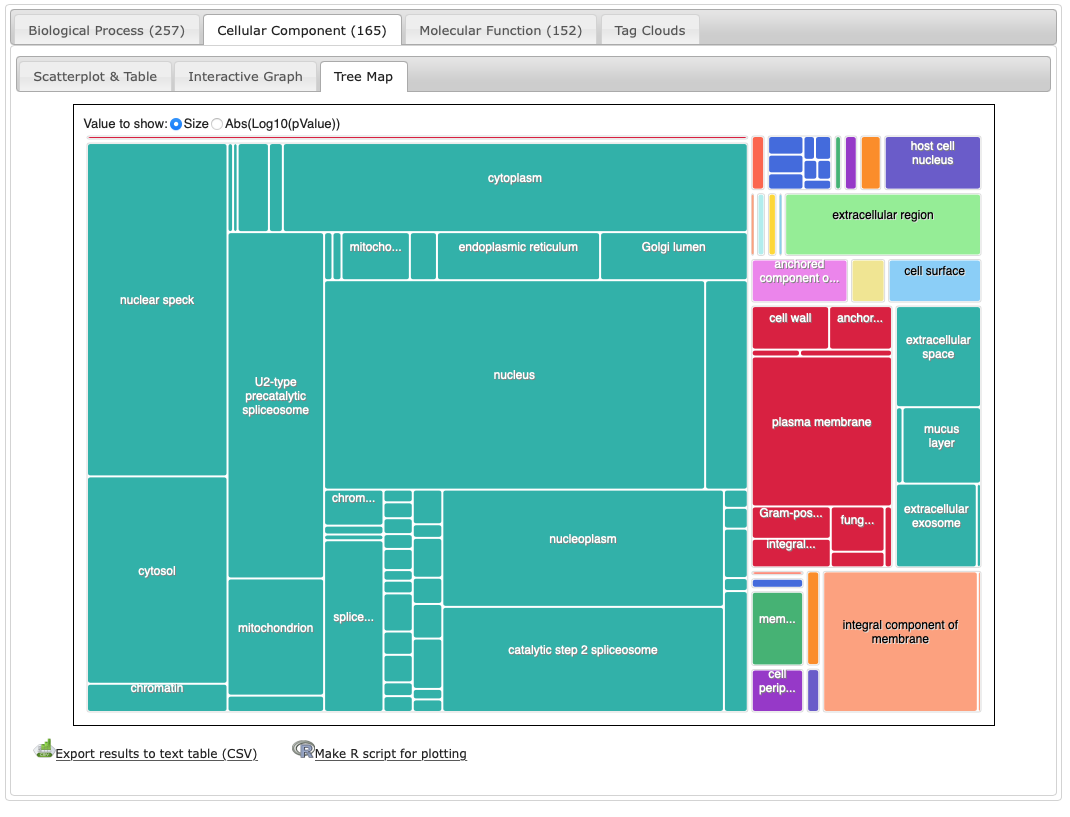
**

a)


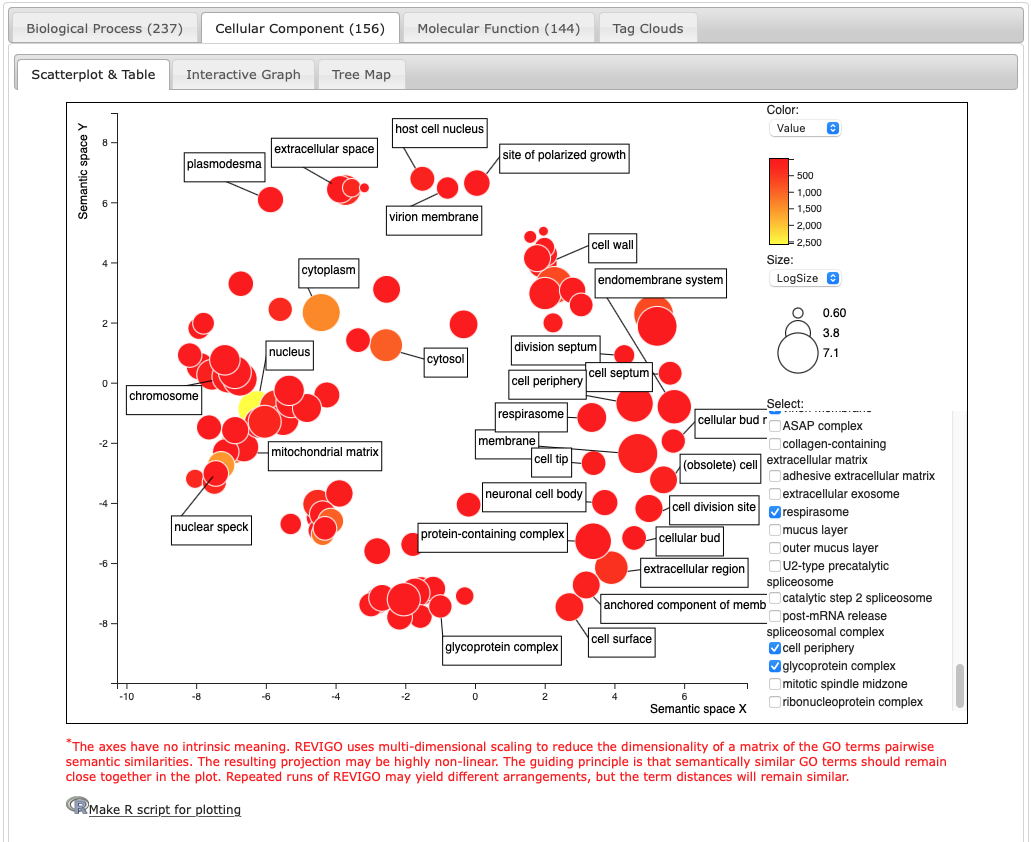

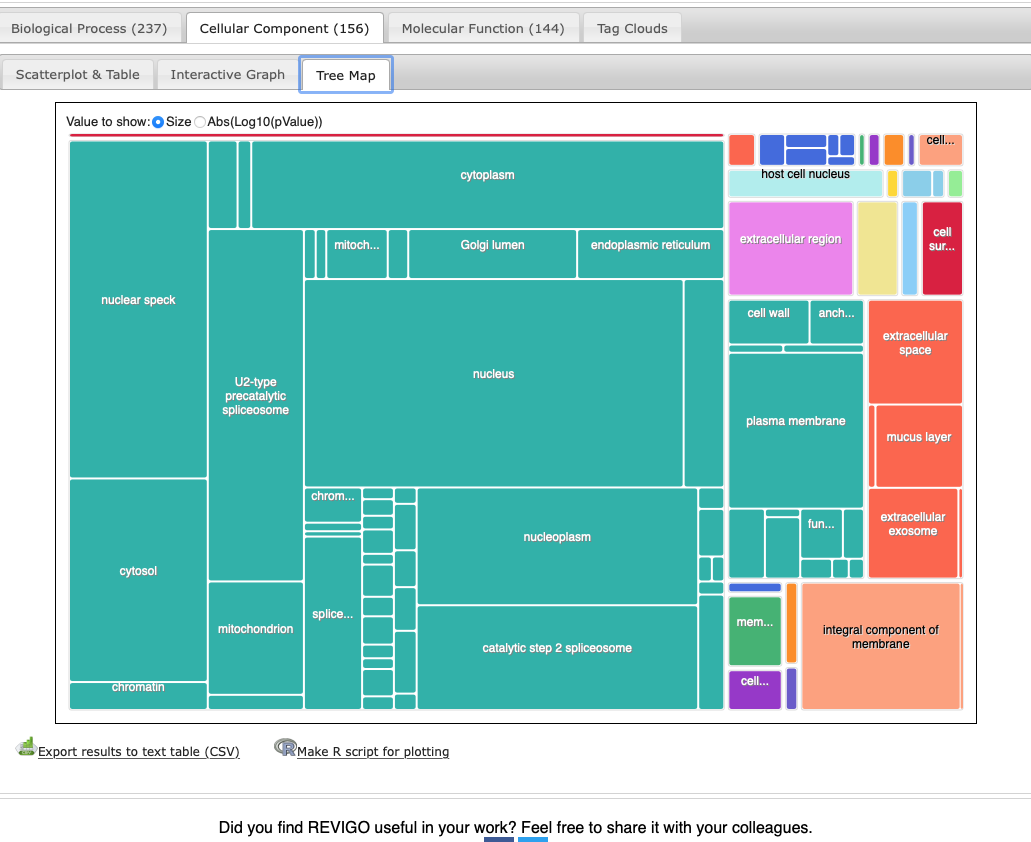


b)

**Supplementary Figure 4.** Gene Ontology (GO) term summaries belonging to the GO topic: cellular components. (a) *Rhodotorula* *babjevae* CBS 7808; (b) *R. babjevae* DBVPG 8058.


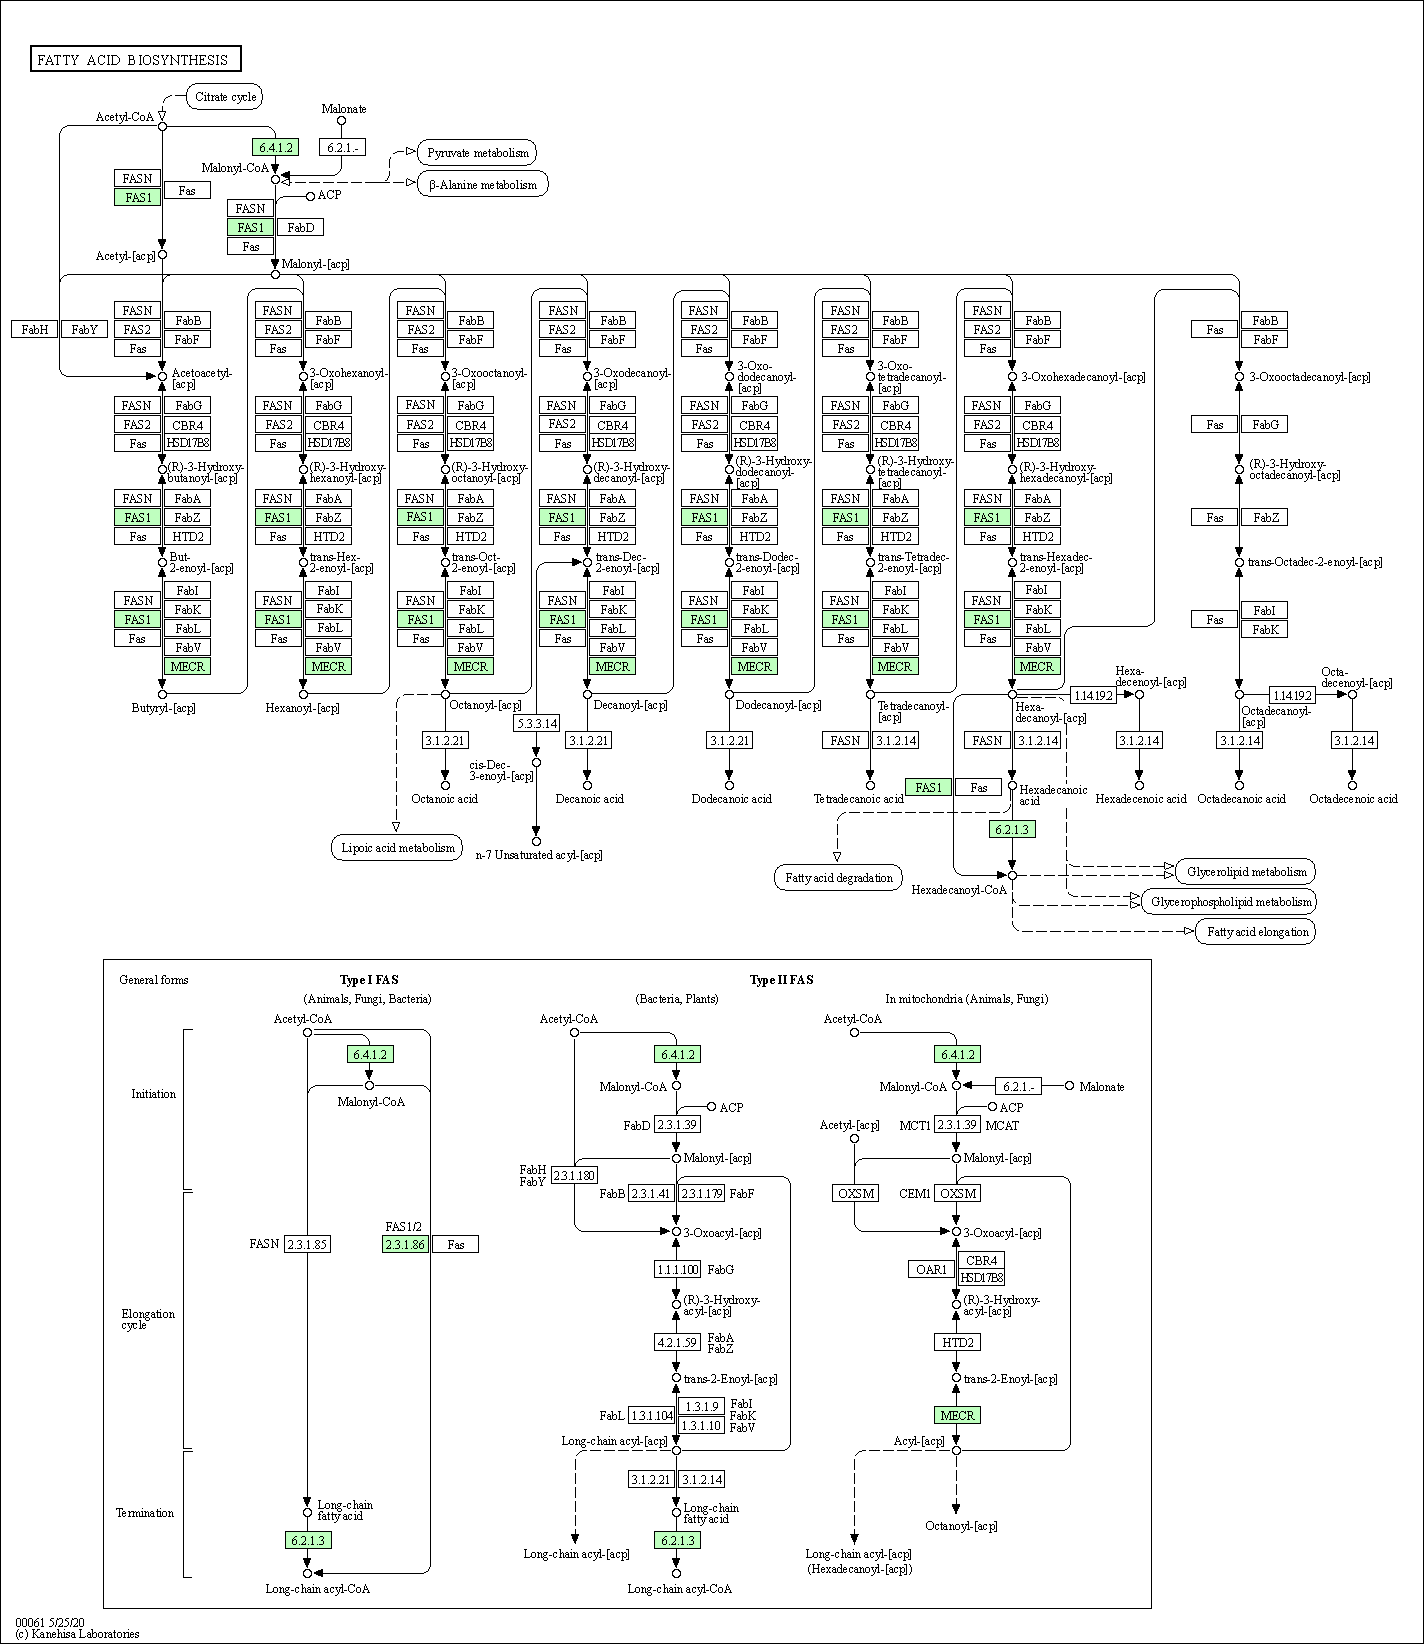


a)

**
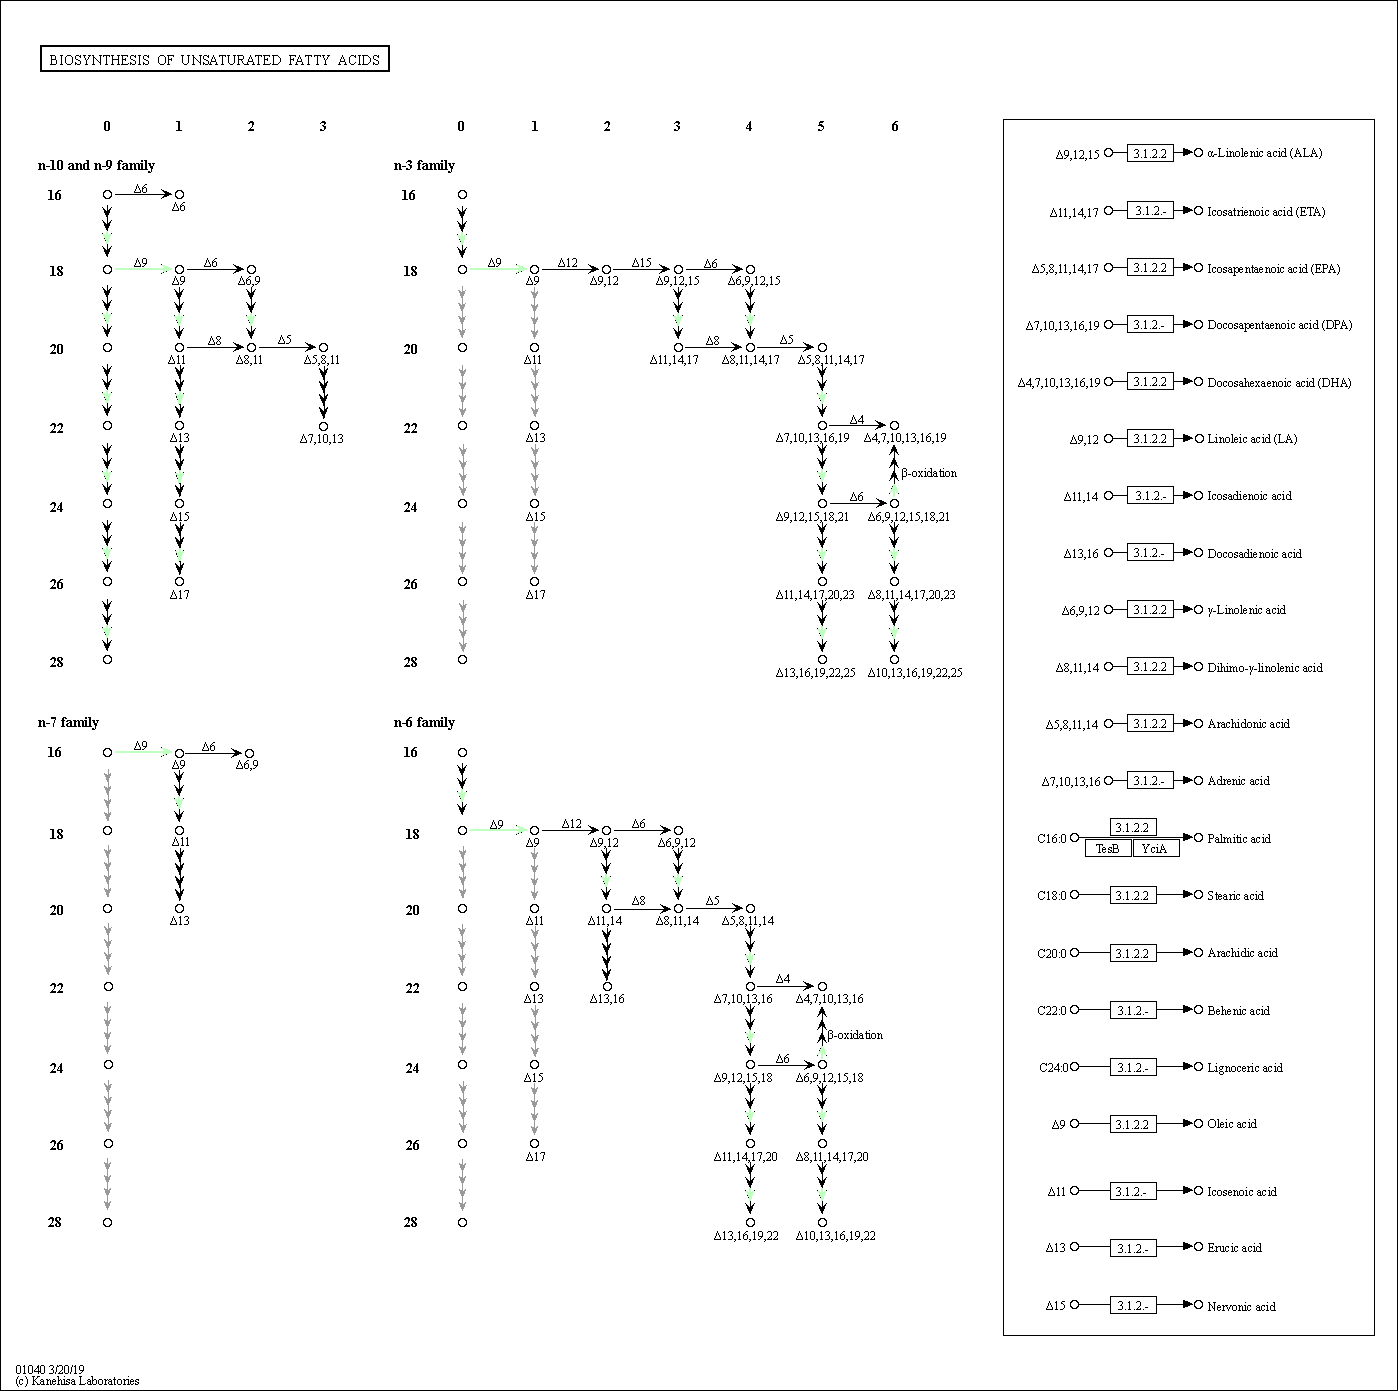
**

b)


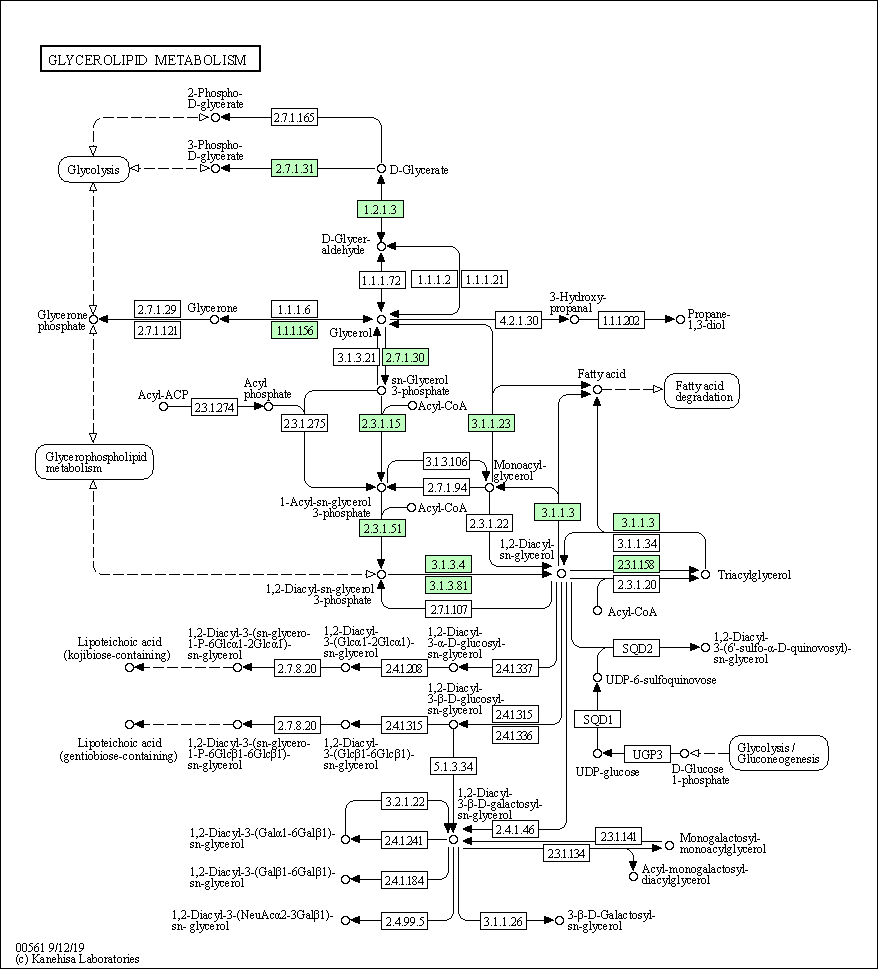


c)

**
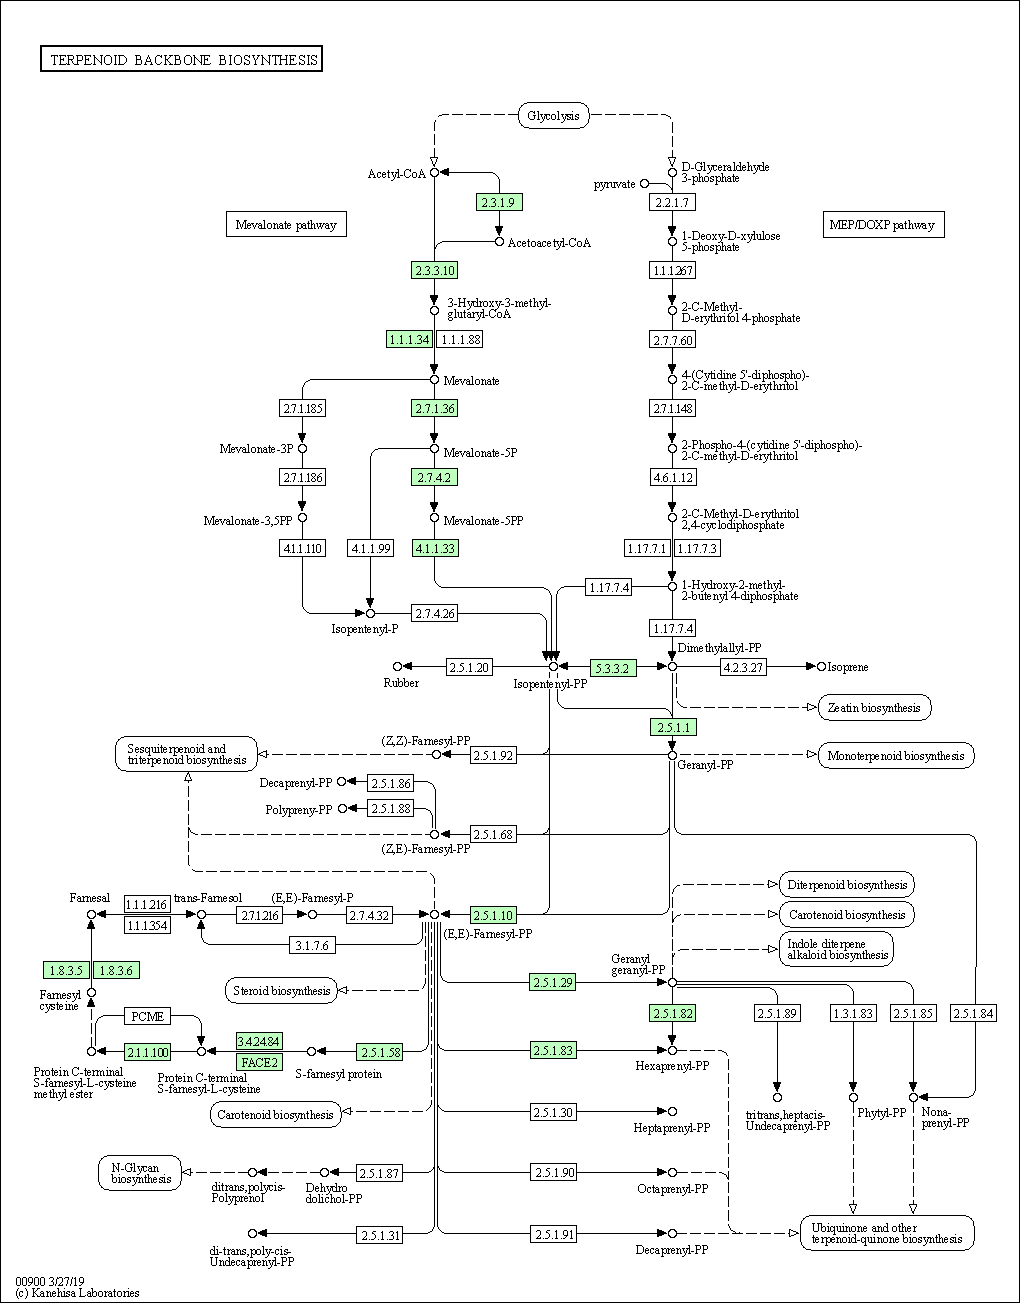
**

d)


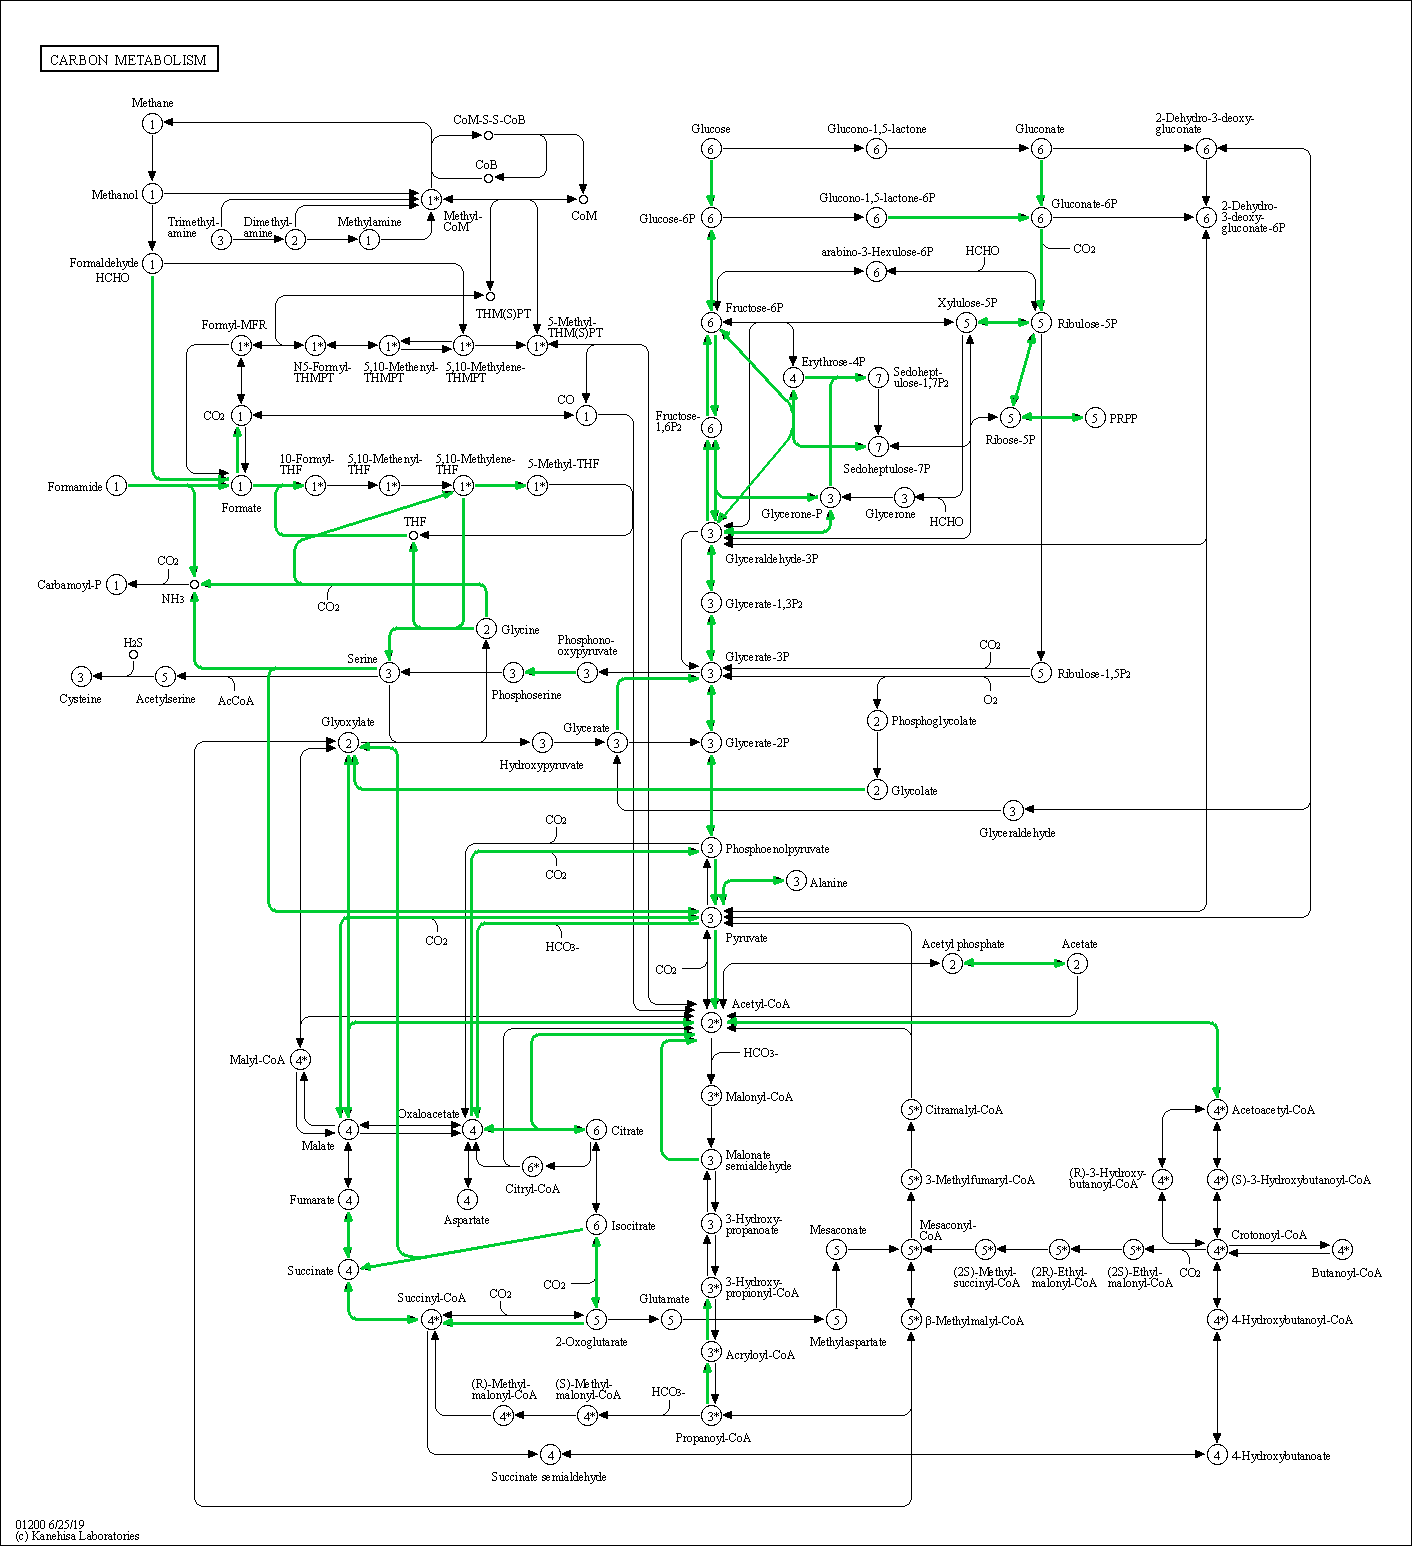


e)

**Supplementary Figure 5.** Examples of lipid metabolism pathways in *Rhodotorula* *babjevae* CBS 7808 reconstructed by KEGG Mapper. The annotated transcripts with affiliated KEGG Orthology (KO) identifiers involved in each metabolic pathway are colored in green. (a) Biosynthesis of fatty acids; (b) biosynthesis of unsaturated fatty acids; (c) glycerolipid methabolism; (d) terpenoid backbone biosynthesis; (e) Carbon metabolism.


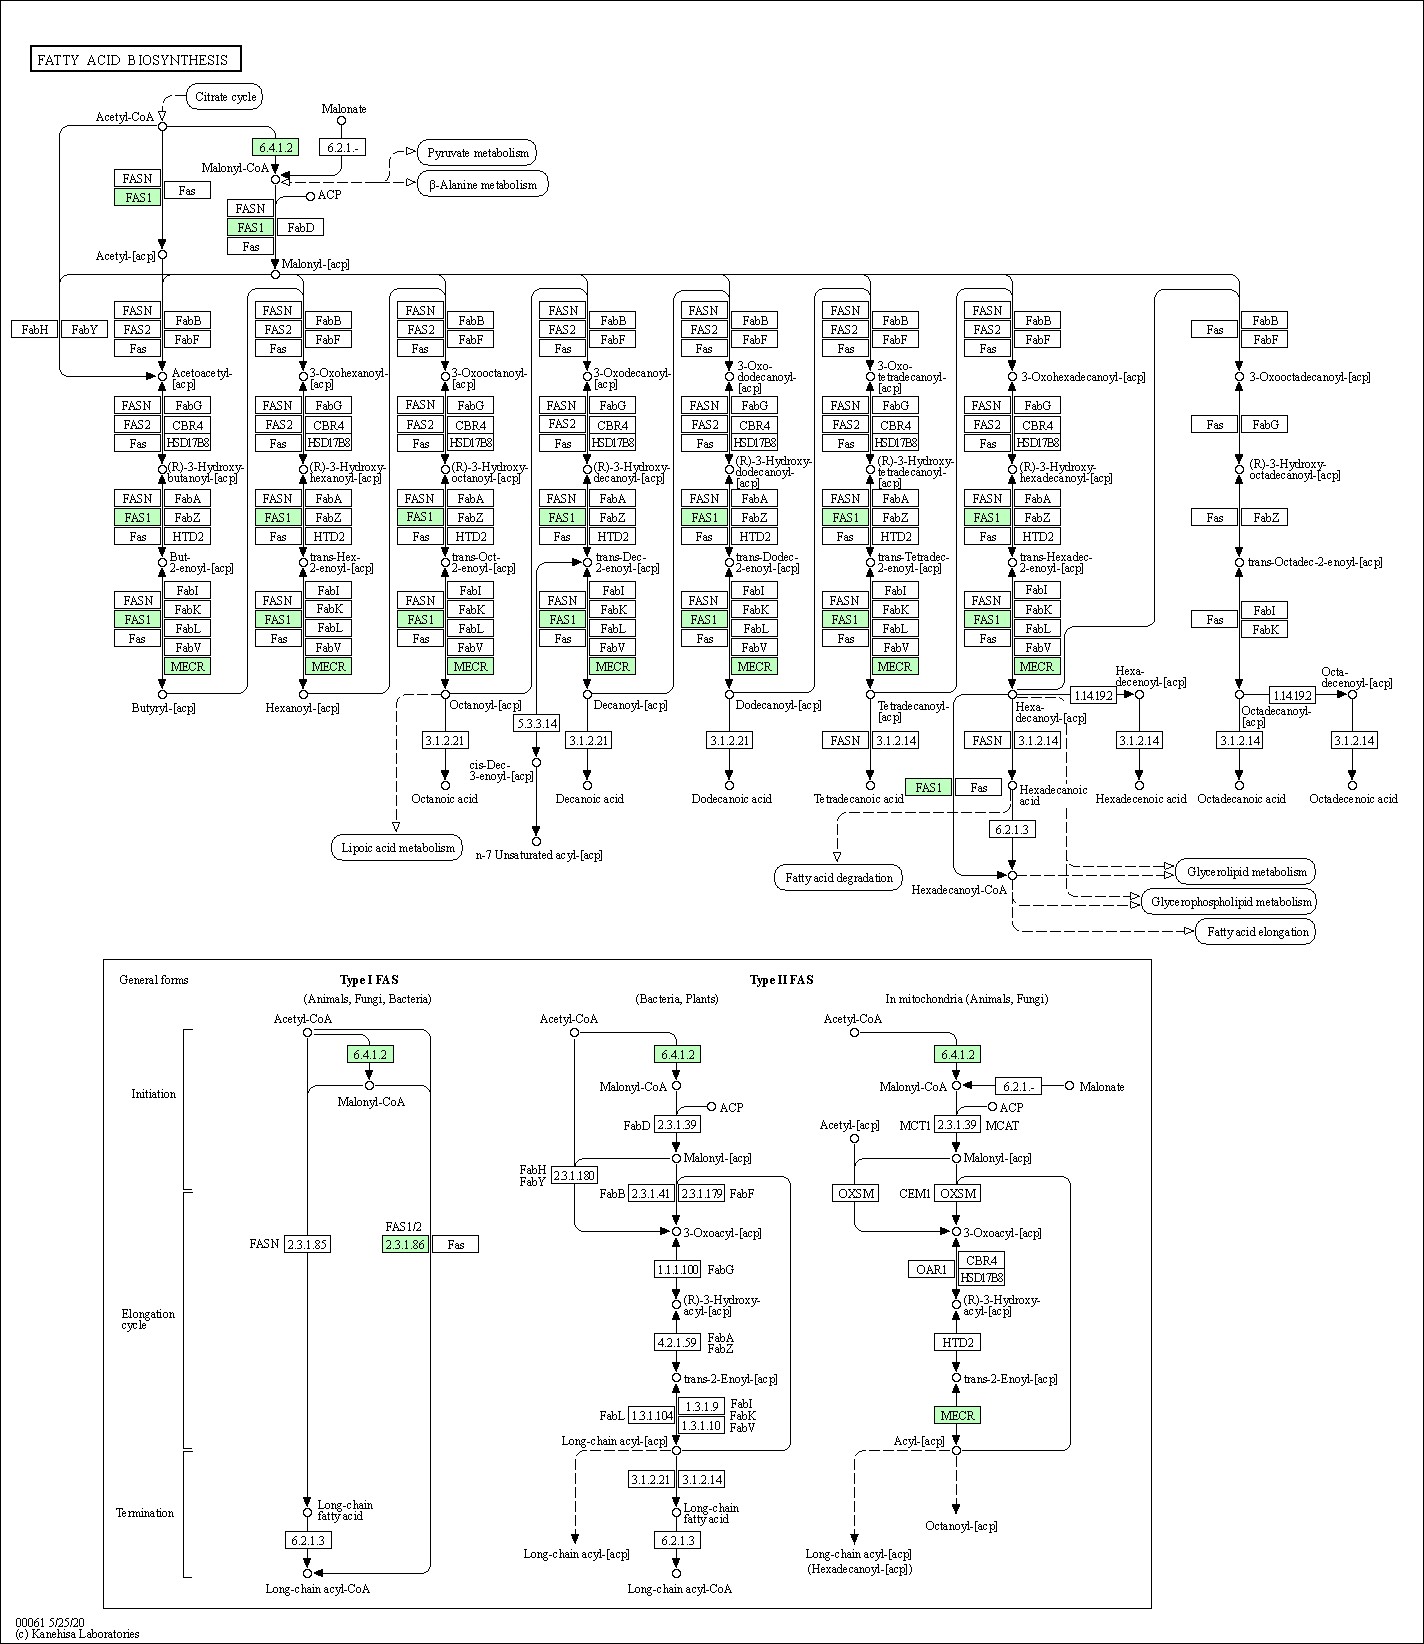


a)


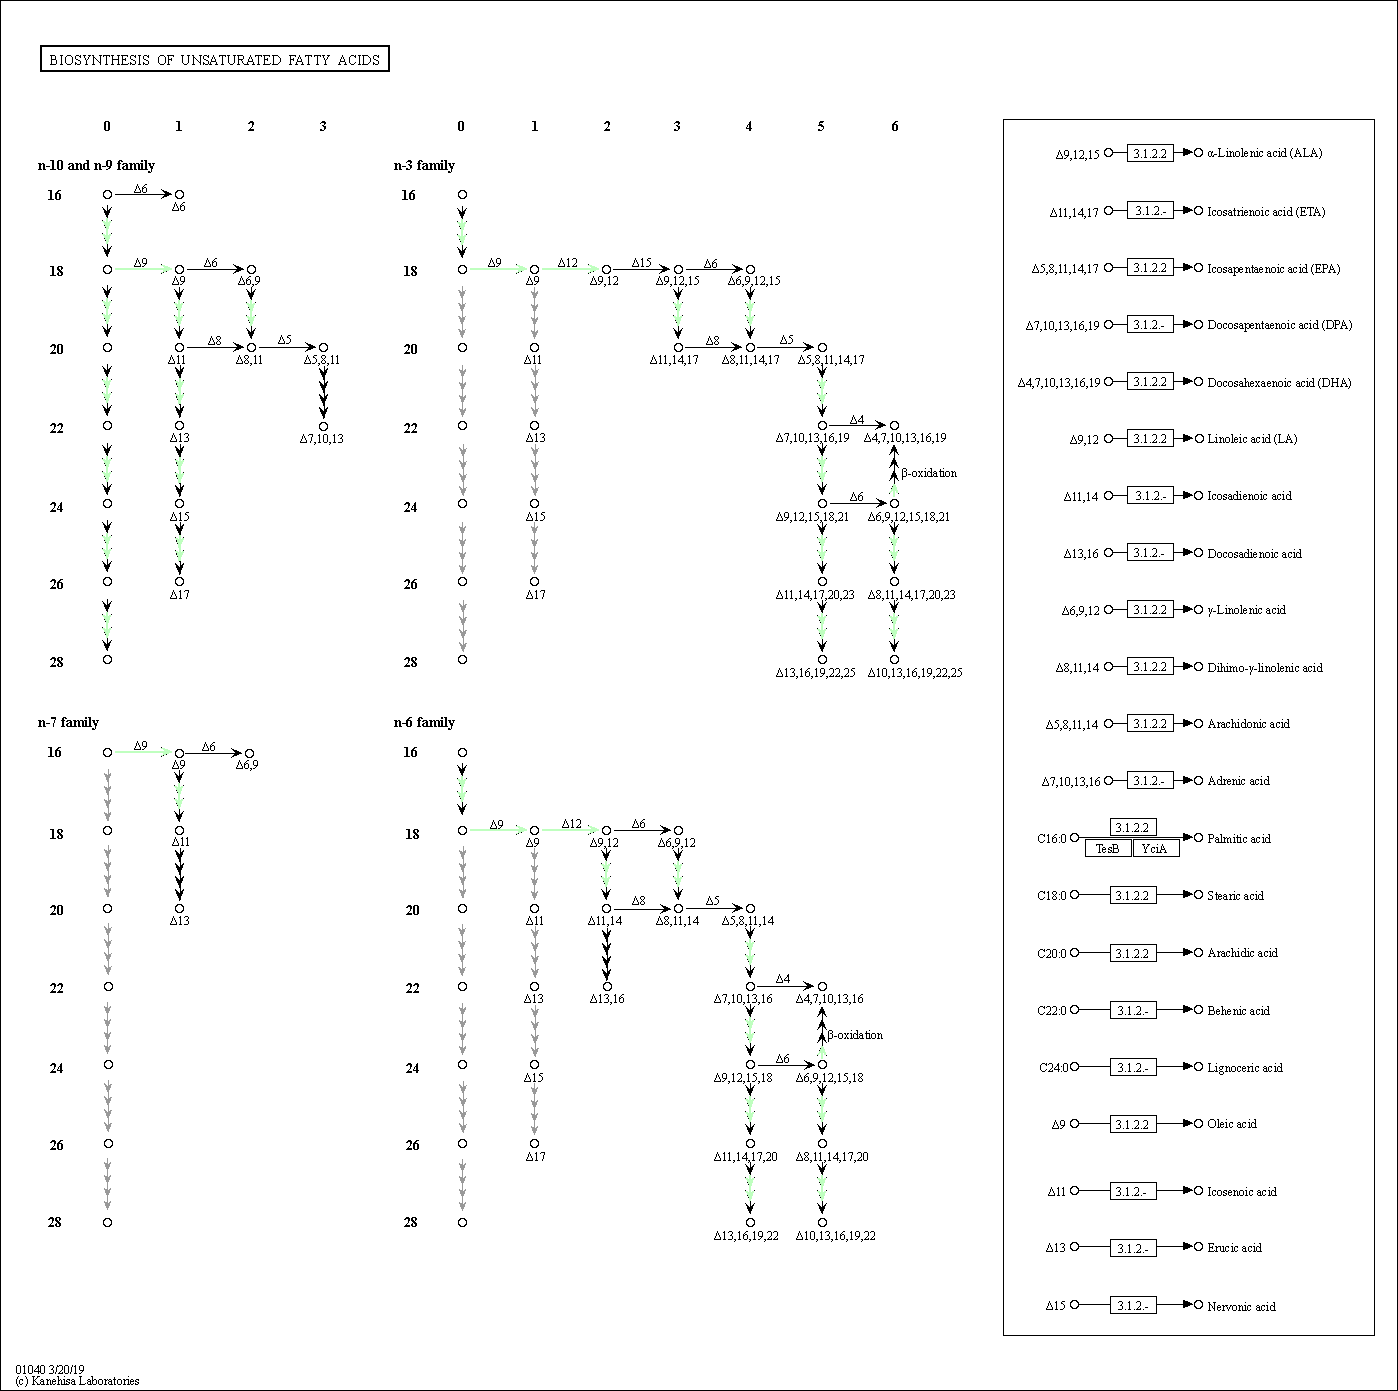


b)


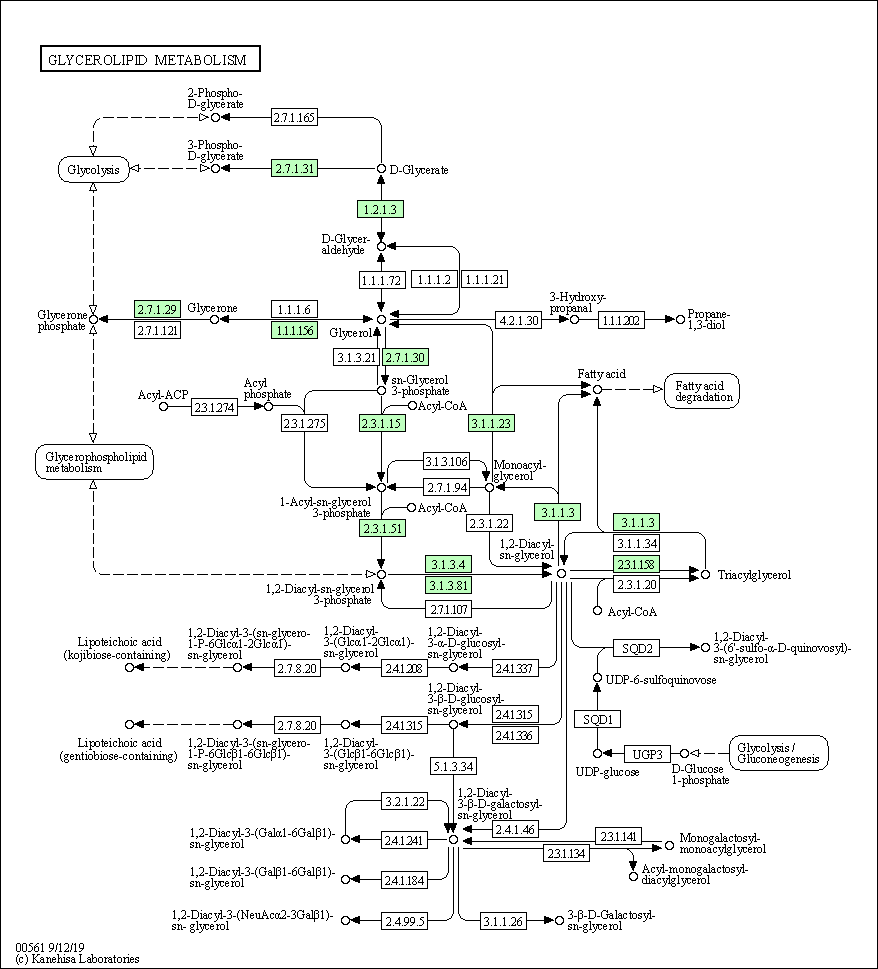


c)

**
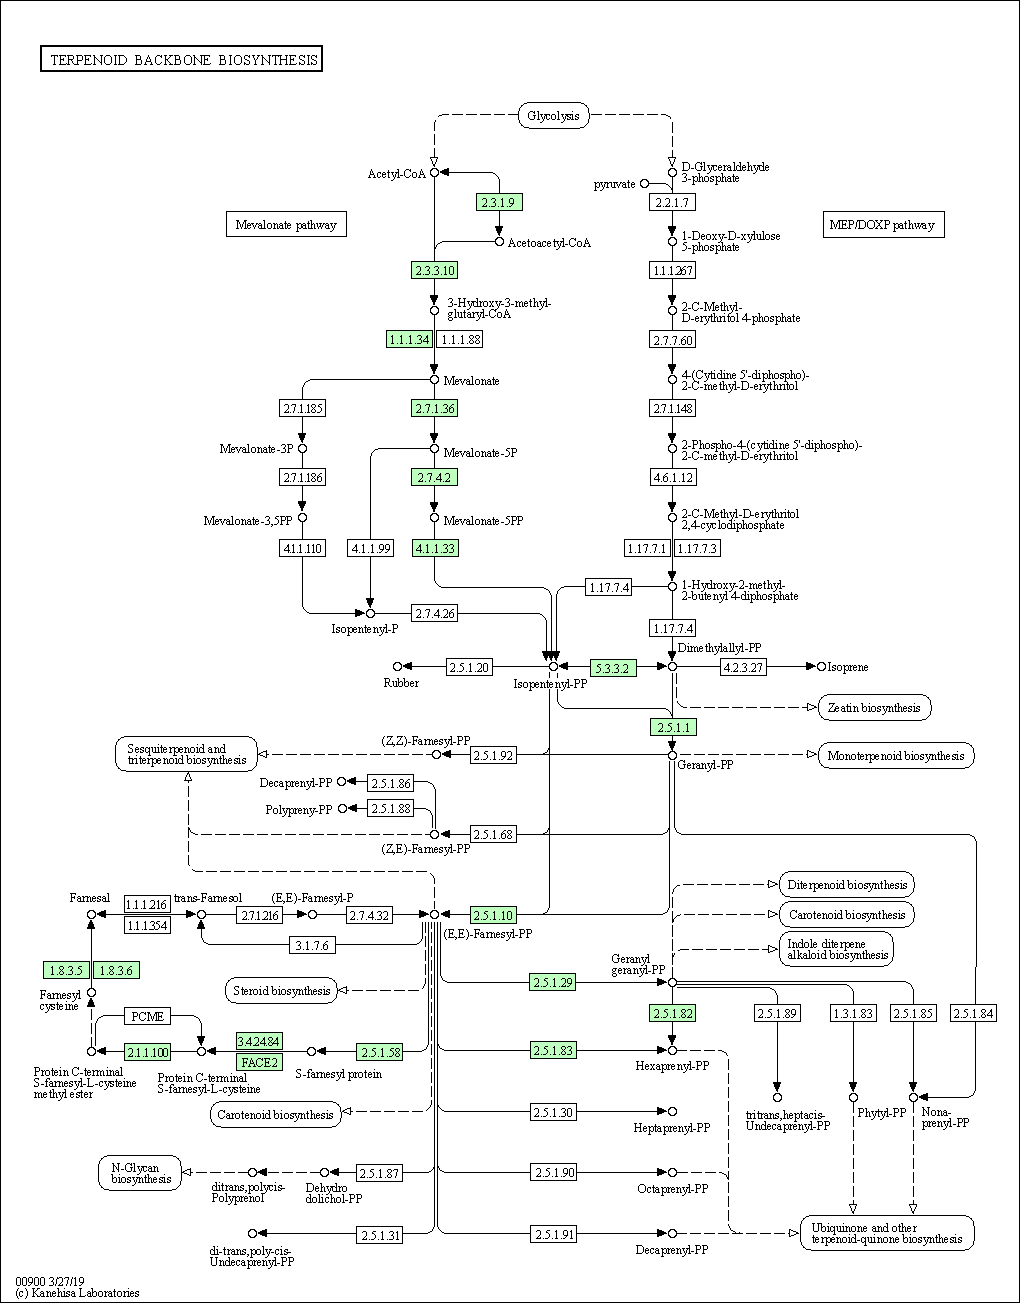
**

d)


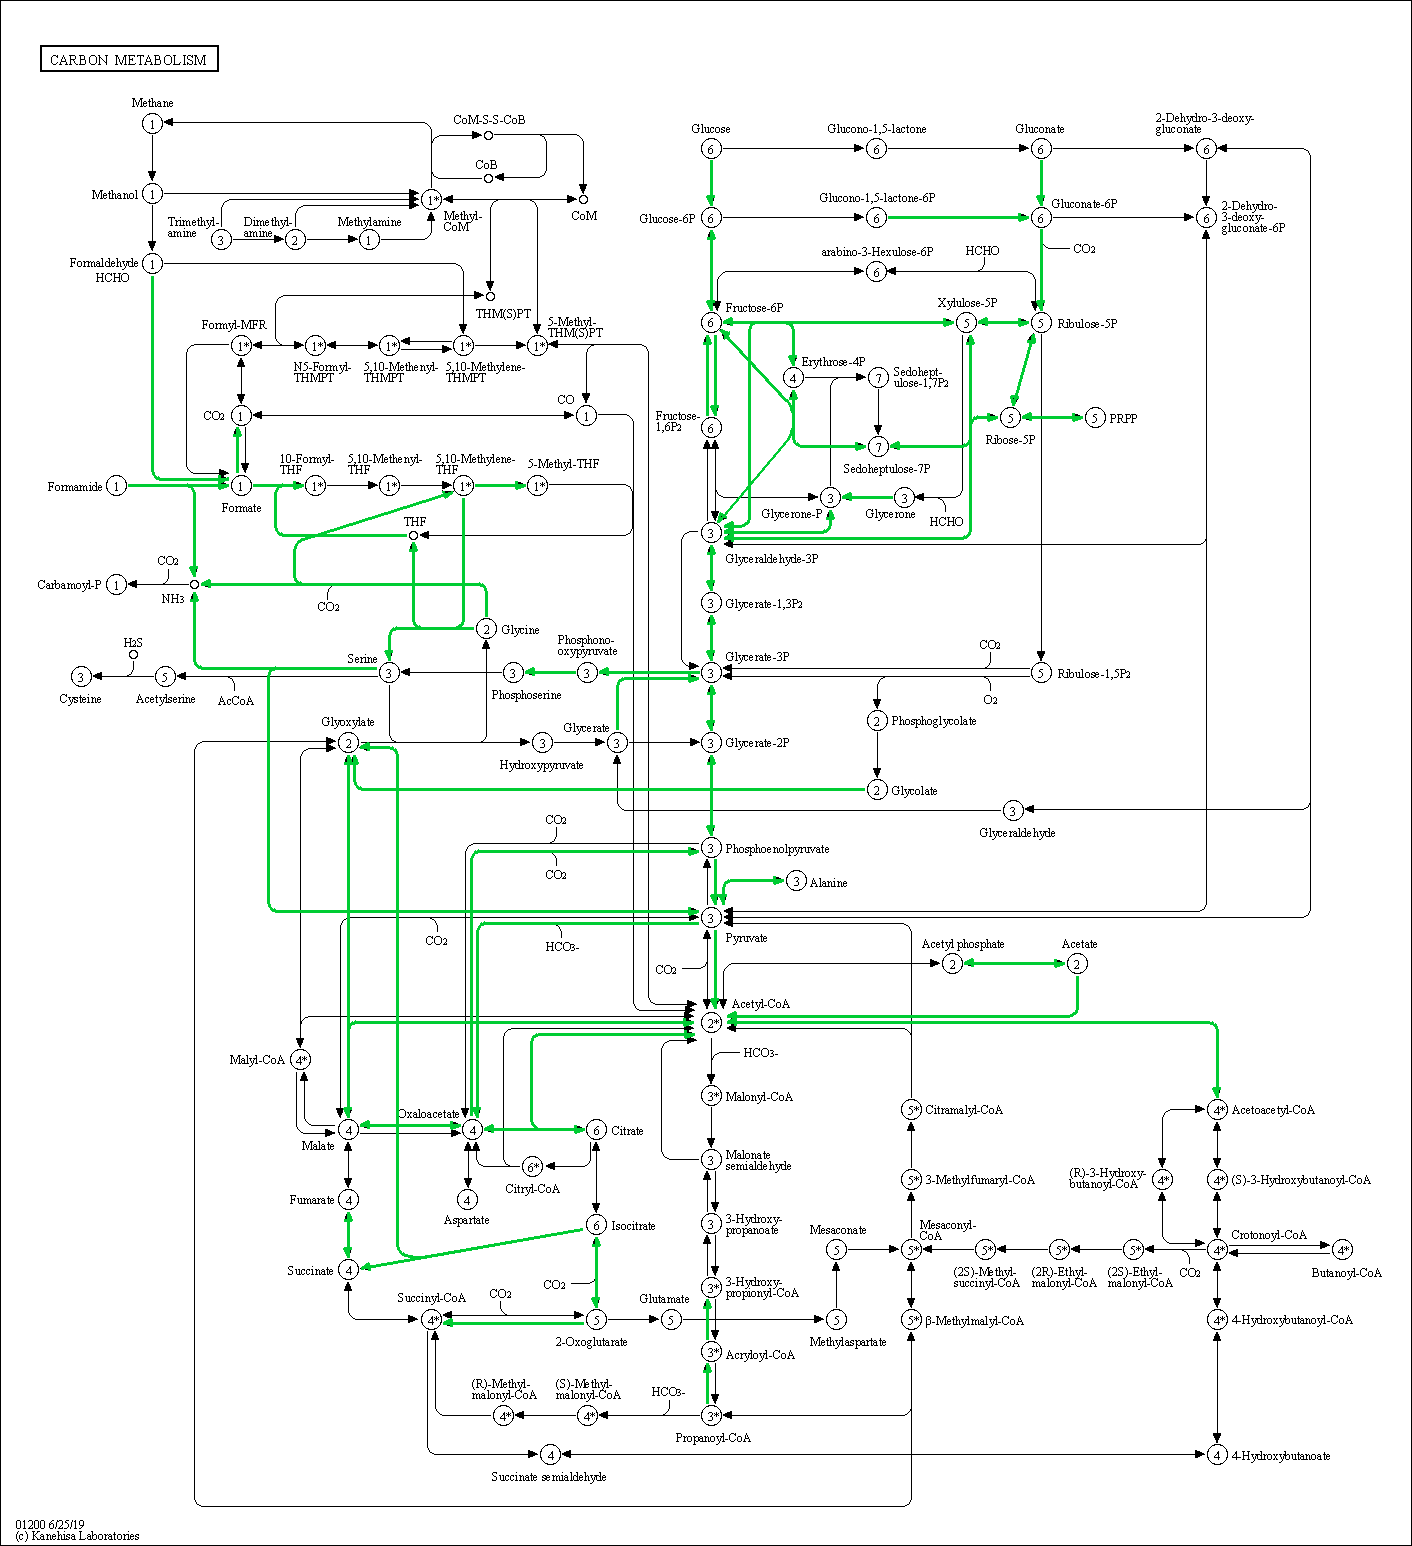


e)

**Supplementary Figure 6.** Examples of lipid metabolism pathways in *Rhodotorula babjevae* DBVPG 8058 reconstructed by KEGG Mapper. The annotated transcripts with affiliated KEGG Orthology (KO) identifiers involved in each metabolic pathway are colored in green. (a) Biosynthesis of fatty acids; (b) biosynthesis of unsaturated fatty acids; (c) glycerolipid methabolism; (d) terpenoid backbone biosynthesis; (e) Carbon metabolism.

a)

b)

**Supplementary Figure 7.** Quantitative assessment of the hybrid genome assemblies and annotation completeness using Benchmarking Universal Single-Copy Orthologs (BUSCO). (a) *Rhodotorula* *babjevae* CBS 7808; (b) *R. babjevae* DBVPG 8058.

**Supplementary Figure 8.** LASTZ alignment of the mitochondrial genome sequences from *Rhodotorula babjevae* CBS 7808 andDBVPG 8058. The alignment was performed with the sequences after circularization. The consensus sequence is represented as a black bar. The identity bar represents pairs as green for 100% mean pairwise identity, green-brown for at least 30% and under 100%, and red for below 30%. In the bar representation of each sequence, pairs with 100% mean pairwise identity are gray and the gaps are represented either as a horizontal line in the contig that lacks the sequence or as a black bar in the contig that contains the sequence. Unique forward alignments are represented in blue and unique reverse alignments in red within LASTZ alignment graph.

a)

b)


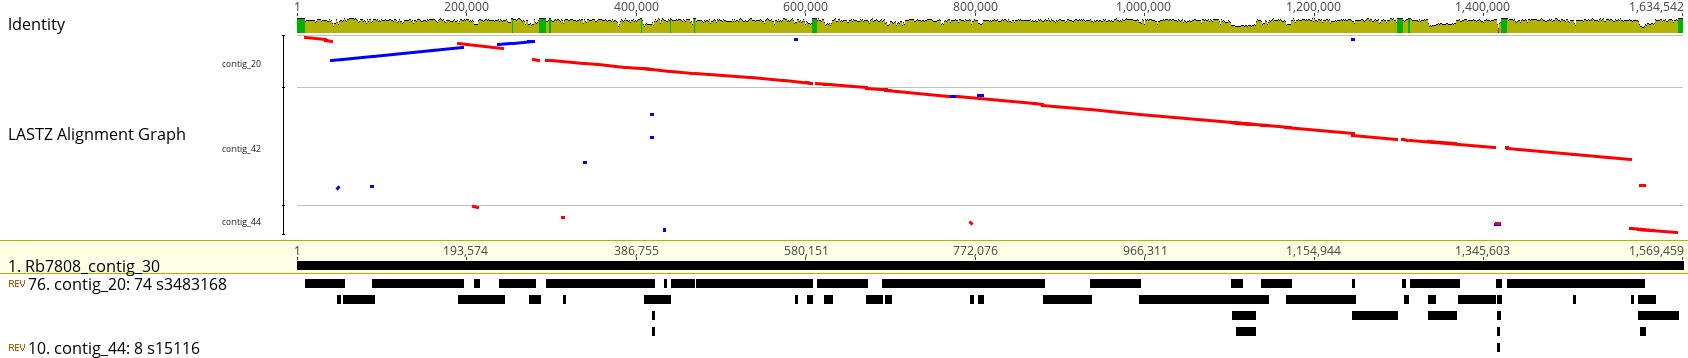


c)

d)

e)

f)

g)

h)

i)

j)

k)

l)

m)

n)

o)

p)

q)

r)

s)

t)

u)

**Supplementary Figure 9.** LASTZ alignment of contigs with assigned homology from *Rhodotorula babjevae* CBS 7808 andDBVPG 8058 representing putative chromosomes. *R. babjevae* putative chromosomes: (a) 1, (b) 2, (c) 3, (d) 4, (e) 5, (f) 6, (g) 7, (h) 8, (i) 9, (j) 10, (k) 11, (l) 12, (m) 13, (n) 14, (o) 15, (p) 16, (q) 17, (r) 18, (s) 19, (t) 20, (u) 21. The identity bar represents pairs as green for 100% mean pairwise identity, green-brown for at least 30% and under 100%, and red for below 30%. In the bar representation of each sequence, pairs with 100% mean pairwise identity are gray and the gaps are represented either as a horizontal line in the contig that lacks the sequence or as a black bar in the contig that contains the sequence. Unique forward alignments are represented in blue and unique reverse alignments in red within LASTZ alignment graph.
